# Supplementary material
Source: Royal Society of Chemistry journal article supplement (doi:10.1039/d6ma00366d)
Supplement: d6ma00366d1.pdf [file d6ma00366d1.pdf]

## Supporting Information

### Photodimerization induced Photomechanical behaviour in Alkyldiammonium Salts of *trans*-Dichlorocinnamates: Exploration of [2+2] Reactions in as Synthesized Salts, Single Crystals and Organogels

Shaheen Sultana, Debasis Pal, Kumar Biradha\*

---

#### Table of Contents

---

**Section 1:** Experimental Details/ Methods

**Section 2:** FT-IR spectra of the salts

**Section 3:** Crystallographic parameters of the salts

**Section 4:** Crystal structure analysis and hydrogen bonding parameters

**Section 5:** List of Cl...Cl interactions parameters.

**Section 6:** Table for geletion

**Section 7:** Rheological characterisation of organogels

**Section 8:** FESEM images of the organogels

**Section 9:** PXRD analysis of xerogels from aqueous- DMSO organogels

**Section 10:** <sup>1</sup>H NMR spectra of the irradiated crystals and organogels

**Section 11:** MALDI-ToF analysis

**Section 12:** Optical microscope images for surface peeling effect

**Section 12:** FESEM images after photomechanical responses

**Section 13:** AFM images after photomechanical responses

**Section 14:** *P-h* curve before and after irradiation for B<sub>2</sub>(A<sub>24</sub>)<sub>2</sub> and B<sub>3</sub>(A<sub>24</sub>)<sub>2</sub>

**Section 15:** Crystal structures illustration for *d*-B<sub>2</sub>(A<sub>24</sub>)<sub>2</sub> and *d*-B<sub>2</sub>(A<sub>34</sub>)<sub>2</sub>

**Section 16:** Solid-state photoluminescence spectra for before and after irradiation

**Section 17:** TGA analysis after I<sub>2</sub> adsorption for B<sub>3</sub>(A<sub>24</sub>)<sub>2</sub> and B<sub>4</sub>(A<sub>24</sub>)<sub>2</sub>

**Section 18:** XPS spectra for B<sub>3</sub>(A<sub>24</sub>)<sub>2</sub> and B<sub>4</sub>(A<sub>24</sub>)<sub>2</sub>

**Section 19:** EDS analysis for the I<sub>2</sub> adsorbed salts

**Section 20:** FT-IR spectra after I<sub>2</sub> adsorption

**Section 21:** PXRD analysis after I<sub>2</sub> adsorption

**Section 22:** Raman spectra after I<sub>2</sub> adsorption

**Section 23:** Comparison table for I<sub>2</sub> uptake capacity of different materials

**Section 24:** EIS plots for aqueous-DMSO gel of B<sub>3</sub>(A<sub>24</sub>)<sub>2</sub> and pellets of I<sub>2</sub>@ B<sub>3</sub>(A<sub>24</sub>)<sub>2</sub> & I<sub>2</sub>@ B<sub>3</sub>(A<sub>24</sub>)<sub>2</sub>

**Section 25:** References

## Experimental Details /Methods

### *General*

All the solvents (SRL chemicals 99.8%), 2,4-/3,4-Dichlorobenzaldehyde (TCI chemicals >95.0%), Malonic acid (Spectrochem >98.0%) 1,2-ethane/1,3-propane/1,4-butanediamine (TCI chemicals >98.0%) were purchased from the respective chemical vendor and used without further purification. NMR spectra were recorded on a Bruker 500 MHz NMR instrument. FT-IR spectra were collected by a PerkinElmer UATR Two spectrometer. Thermogravimetric analysis (TGA) and Differential thermal analysis (DTA) were done under a nitrogen atmosphere at a heating rate of 10 °C/min with a PerkinElmer instrument, Pyris Diamond TG/DTA. The solid-state luminescence spectra were recorded with a Spex Fluorolog-3 (model FL3-22) spectrofluorometer. Optical microscopic images of the solvates were captured with ACUCAL stereo zoom microscope. Single-crystal data were collected on a Bruker D8-Venture X-ray diffractometer that used graphite-monochromated Mo K $\alpha$  radiation ( $\lambda = 0.71073$  Å) by the hemisphere method. The structures were solved by direct methods and refined by the least-squares method on  $F^2$  using SHELXL-2018/3. Non-hydrogen atoms were refined anisotropically, and hydrogen atoms were fixed at calculated positions and refined by using a riding model. The PXRD patterns were collected in Bragg–Brentano mode using a D8-Advance A-25 diffractometer (Cu K $\alpha$ 1 radiation,  $\lambda=1.54060$  Å) at ambient conditions (T = 298 K). FESEM images of the crystals were recorded by using field emission scanning electron microscope, Gemini ZEISS SUPRA-40, Model no. 2593 with oxford EDS detector. X-ray photoelectron spectroscopy (XPS) was performed using ESCALAB Xi, Thermo-Scientific, UK, with a monochromatic Al K $\alpha$  X-ray source (1486.6 eV). The CAE (constant analyzer energy) for survey spectra is 100 eV and that for high-resolution spectra is 50 eV. AFM images were taken using Agilent Technology, Nanonics Type-020-525028 AFM instrument. MALDI-TOF experiments were performed using a BRUKER ULTRAFLEXTRME MALDI TOF/TOF mass spectrometer using 2,5-dihydroxybenzoic acid as the matrix. Nanoindentation was performed using TI 950 TriboIndenter, Hysitron Inc.

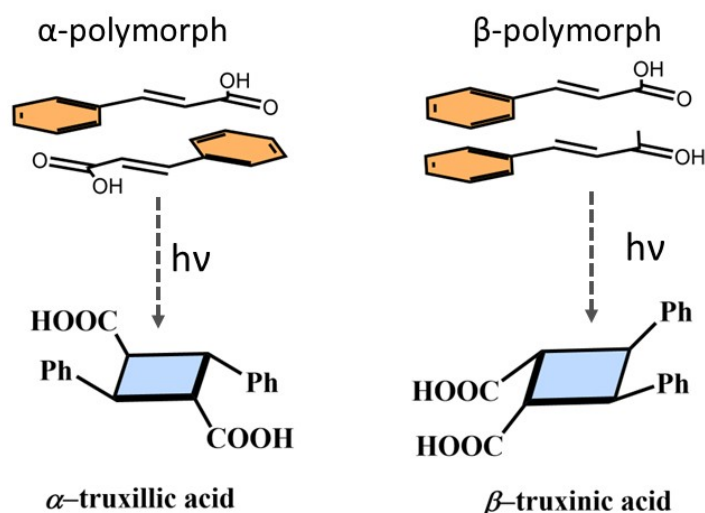

**Scheme S1.** Illustration of crystal packing and [2+2] reactivity in the polymorph of cinnamic acid.

### Synthesis and Characterization

All the salts were synthesized by reacting the alkyl diamines ( $\text{H}_2\text{N}-(\text{CH}_2)_n-\text{NH}_2$ ,  $n = 2-4$ ) with corresponding monocarboxylic acids; *trans*-2,4/3,4-dichlorocinnamic acid in 1:2 molar ratio in methanol. All the salts prepared were characterized by FTIR,  $^1\text{H-NMR}$ , and single crystal x-ray diffraction in few cases.

**B<sub>2</sub>(A<sub>24</sub>)<sub>2</sub>:**  $^1\text{H NMR}$  (400 MHz,  $\text{DMSO-}d_6$ ):  $\delta = 7.85-7.83$  (d,  $J = 8\text{Hz}$ , 1H), 7.67 (s, 1H), 7.60-7.56 (d,  $J = 16\text{Hz}$ , 1H), 7.44-7.42 (d,  $J = 8\text{Hz}$ , 1H), 6.58-6.54 (d,  $J = 16\text{Hz}$ , 1H), 3.64 (m, 3H), 2.83 (m, 2H). FT-IR (KBr pellet): 3029, 2924, 1645, 1546, 1500, 1466, 1392, 1373, 1334, 1272, 1195, 1102, 1067, 1044, 971, 859, 835, 816, 770, 700, 658, 557  $\text{cm}^{-1}$ .

**B<sub>2</sub>(A<sub>34</sub>)<sub>2</sub>:**  $^1\text{H NMR}$  (400 MHz,  $\text{DMSO-}d_6$ ):  $\delta = 7.91-7.89$  (d,  $J = 8\text{Hz}$ , 1H), 7.63-7.61 (d,  $J = 8\text{Hz}$ , 2H), 7.33-7.29 (d,  $J = 16\text{Hz}$ , 1H), 6.60-6.56 (d,  $J = 16\text{Hz}$ , 1H), 3.63 (m, 2H), 2.83 (m, 2H). FT-IR (KBr pellet): 2572, 2208, 1649, 1554, 1505, 1481, 1399, 1369, 1285, 1236, 1195, 1138, 1032, 1008, 984, 918, 869, 829, 763, 737, 693, 570, 538, 513  $\text{cm}^{-1}$ .

**B<sub>3</sub>(A<sub>24</sub>)<sub>2</sub>:**  $^1\text{H NMR}$  (400 MHz,  $\text{DMSO-}d_6$ ):  $\delta = 7.83-7.82$  (d,  $J = 8\text{Hz}$ , 1H), 7.66 (s, 1H), 7.54-7.51 (d,  $J = 12\text{Hz}$ , 1H), 7.43-7.41 (d,  $J = 8\text{Hz}$ , 1H), 6.54-6.51 (d,  $J = 12\text{Hz}$ , 1H), 2.83 (t, 2H), 1.78 (t, 1H). FT-IR (KBr pellet): 2944, 2937, 1646, 1592, 1552, 1503, 1470, 1356, 1274, 1136, 1095, 1046, 973, 875, 818, 761, 696, 655, 557  $\text{cm}^{-1}$ .

**B<sub>3</sub>(A<sub>34</sub>)<sub>2</sub>:**  $^1\text{H NMR}$  (400 MHz,  $\text{DMSO-}d_6$ ):  $\delta = 7.82-7.81$  (d,  $J = 4\text{Hz}$ , 1H), 7.59-7.57 (d,  $J = 8\text{Hz}$ , 1H), 7.55-7.53 (d,  $J = 8\text{Hz}$ , 1H), 7.22-7.18 (d,  $J = 16\text{Hz}$ , 1H), 6.54-6.50 (d,  $J = 16\text{Hz}$ , 1H), 2.84 (t,

2H), 1.80 (m, 1H). FT-IR (KBr pellet): 2921, 2840, 1647, 1551, 1514, 1502, 1470, 1402, 1378, 1282, 1233, 1209, 1143, 1136, 1030, 981, 905, 857, 819, 753, 686, 584, 505 cm<sup>-1</sup>.

**B<sub>4</sub>(A<sub>24</sub>)<sub>2</sub>**: <sup>1</sup>H NMR (400 MHz, DMSO-*d*<sub>6</sub>): δ = 7.95-7.94 (d, J = 4Hz, 1H), 7.80-7.77 (d, J =12Hz 1H), 7.71-7.70 (d, J =4Hz, 1H), 7.48-7.45 (dd, J = 4Hz, 1H), 6.64-6.61 (d, J = 12Hz, 1H), 2.79 (m, 2H), 1.57 (m, 2H). FT-IR (KBr pellet): 2995, 2945, 2874, 1638, 1583, 1532, 1472, 1370, 1292, 1268, 1138, 1093, 1063, 1045, 970, 892, 863, 829, 764, 743, 691, 657, 558, 506 cm<sup>-1</sup>.

**B<sub>4</sub>(A<sub>34</sub>)<sub>2</sub>**: <sup>1</sup>H NMR (400 MHz, DMSO-*d*<sub>6</sub>): δ = 8.01 (s, 1H), 7.72-7.64 (q, 1H), 7.58-7.54 (d, J =16Hz, 1H), 6.66-6.62 (d, J = 16Hz, 1H), 6.03 (m, 3H), 2.82 (m, 2H), 1.59 (m, 2H). FT-IR (KBr pellet): 3039, 2982, 1650, 1609, 1523, 1470, 1446, 1387, 1366, 1290, 1269, 1233, 1192, 1131, 1066, 1029, 968, 890, 862, 821, 760, 683, 560, 532, 503 cm<sup>-1</sup>.

| Compounds                                      | B <sub>2</sub> (A <sub>24</sub> ) <sub>2</sub>                                | B <sub>3</sub> (A <sub>24</sub> ) <sub>2</sub>                                | B <sub>4</sub> (A <sub>24</sub> ) <sub>2</sub>                  | B <sub>4</sub> (A <sub>34</sub> ) <sub>2</sub>                  | <i>d</i> -B <sub>2</sub> (A <sub>24</sub> ) <sub>2</sub>                      | <i>d</i> -B <sub>2</sub> (A <sub>34</sub> ) <sub>2</sub>                      |
|------------------------------------------------|-------------------------------------------------------------------------------|-------------------------------------------------------------------------------|-----------------------------------------------------------------|-----------------------------------------------------------------|-------------------------------------------------------------------------------|-------------------------------------------------------------------------------|
| Formula                                        | C <sub>20</sub> H <sub>20</sub> Cl <sub>4</sub> N <sub>2</sub> O <sub>6</sub> | C <sub>21</sub> H <sub>16</sub> Cl <sub>4</sub> N <sub>2</sub> O <sub>4</sub> | C <sub>11</sub> H <sub>12</sub> Cl <sub>2</sub> NO <sub>2</sub> | C <sub>11</sub> H <sub>12</sub> Cl <sub>2</sub> NO <sub>2</sub> | C <sub>20</sub> H <sub>20</sub> Cl <sub>4</sub> N <sub>2</sub> O <sub>4</sub> | C <sub>20</sub> H <sub>20</sub> Cl <sub>4</sub> N <sub>2</sub> O <sub>4</sub> |
| CCDC                                           | <b>2533551</b>                                                                | <b>2533552</b>                                                                | <b>2533556</b>                                                  | <b>2533553</b>                                                  | <b>2533555</b>                                                                | <b>2533554</b>                                                                |
| Mol. Wt.                                       | 526.18                                                                        | 502.16                                                                        | 261.12                                                          | 261.12                                                          | 494.18                                                                        | 494.18                                                                        |
| T (K)                                          | 306                                                                           | 300                                                                           | 304                                                             | 303                                                             | 301                                                                           | 303                                                                           |
| System                                         | monoclinic                                                                    | orthorhombic                                                                  | triclinic                                                       | triclinic                                                       | monoclinic                                                                    | monoclinic                                                                    |
| Space group                                    | <i>P</i> <sub>2</sub> <sub>1</sub> / <i>c</i>                                 | <i>Pbca</i>                                                                   | <i>P</i> -1                                                     | <i>P</i> -1                                                     | <i>P</i> <sub>2</sub> <sub>1</sub> / <i>c</i>                                 | <i>P</i> <sub>2</sub> <sub>1</sub> / <i>c</i>                                 |
| a (Å)                                          | 7.739(2)                                                                      | 8.365(10)                                                                     | 6.7040(8)                                                       | 7.2940(11)                                                      | 19.923(2)                                                                     | 20.664(6)                                                                     |
| b (Å)                                          | 38.409(11)                                                                    | 13.846(18)                                                                    | 8.4116(10)                                                      | 7.3566(10)                                                      | 7.8306(8)                                                                     | 7.984(2)                                                                      |
| c (Å)                                          | 8.028(3)                                                                      | 41.35(5)                                                                      | 11.5801(13)                                                     | 11.7557(19)                                                     | 14.0052(13)                                                                   | 13.230(4)                                                                     |
| α (°)                                          | 90                                                                            | 90                                                                            | 71.576(7)                                                       | 88.446(5)                                                       | 90                                                                            | 90                                                                            |
| β (°)                                          | 91.796(10)                                                                    | 90                                                                            | 80.805(7)                                                       | 84.280(5)                                                       | 99.688(3)                                                                     | 102.428(9)                                                                    |
| γ (°)                                          | 90                                                                            | 90                                                                            | 79.641(8)                                                       | 72.170(4)                                                       | 90                                                                            | 90                                                                            |
| V (Å <sup>3</sup> )                            | 2385.1(13)                                                                    | 4789(10)                                                                      | 605.73(13)                                                      | 597.51(16)                                                      | 2153.8(4)                                                                     | 2131.7(10)                                                                    |
| Z                                              | 4                                                                             | 8                                                                             | 2                                                               | 2                                                               | 4                                                                             | 4                                                                             |
| D (g/cm <sup>3</sup> )                         | 1.465                                                                         | 1.393                                                                         | 1.432                                                           | 1.450                                                           | 1.524                                                                         | 1.540                                                                         |
| R <sub>1</sub> [I > 2σ(I)]                     | 0.1044                                                                        | 0.0704                                                                        | 0.0522                                                          | 0.0663                                                          | 0.0579                                                                        | 0.0585                                                                        |
| wR <sub>2</sub> (on F <sup>2</sup> , all data) | 0.2608                                                                        | 0.2484                                                                        | 0.1910                                                          | 0.1966                                                          | 0.1887                                                                        | 0.1905                                                                        |

**Table S1.** Crystallographic parameters.

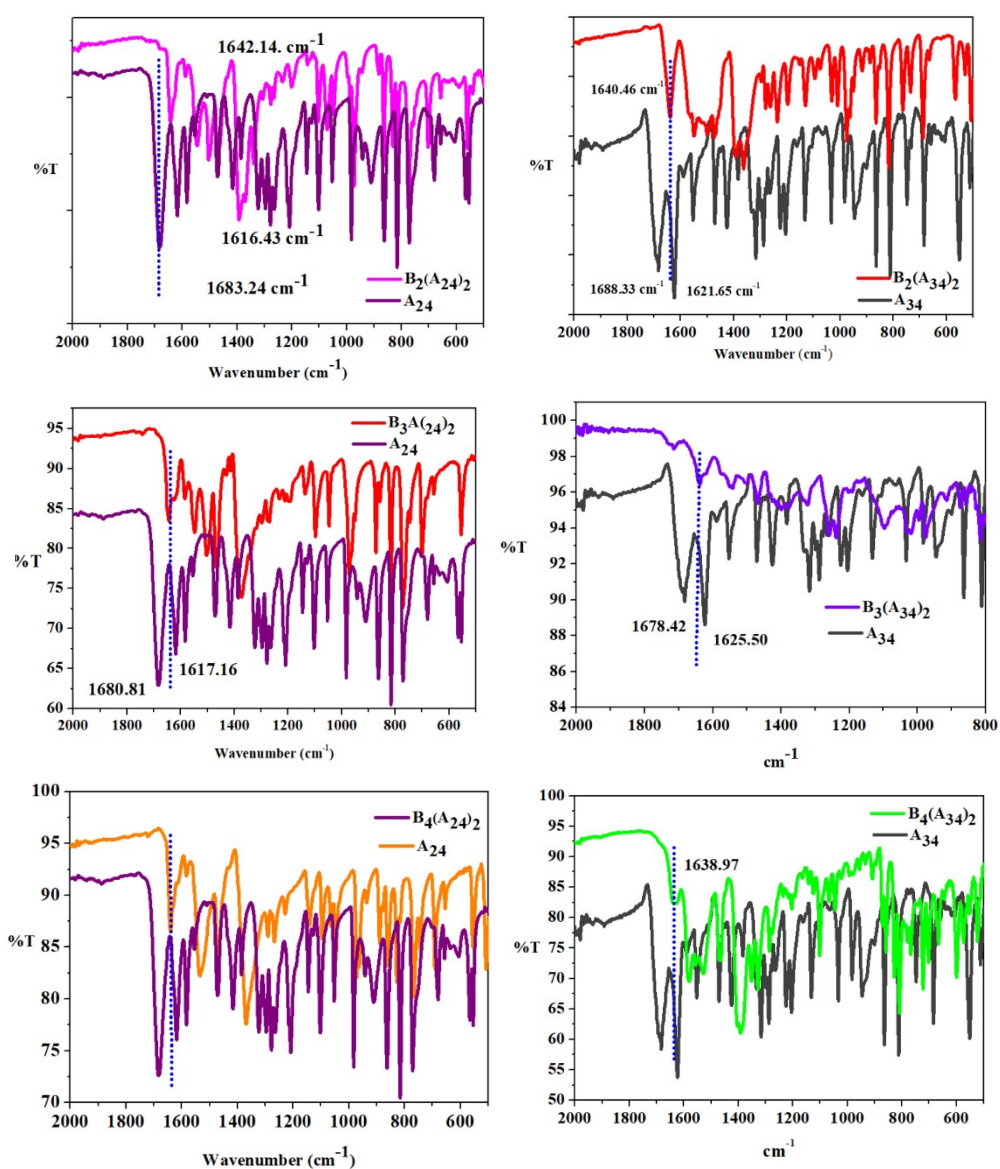

Figure S1 FTIR spectra confirming ammonium salts formation.

PXRD analysis:

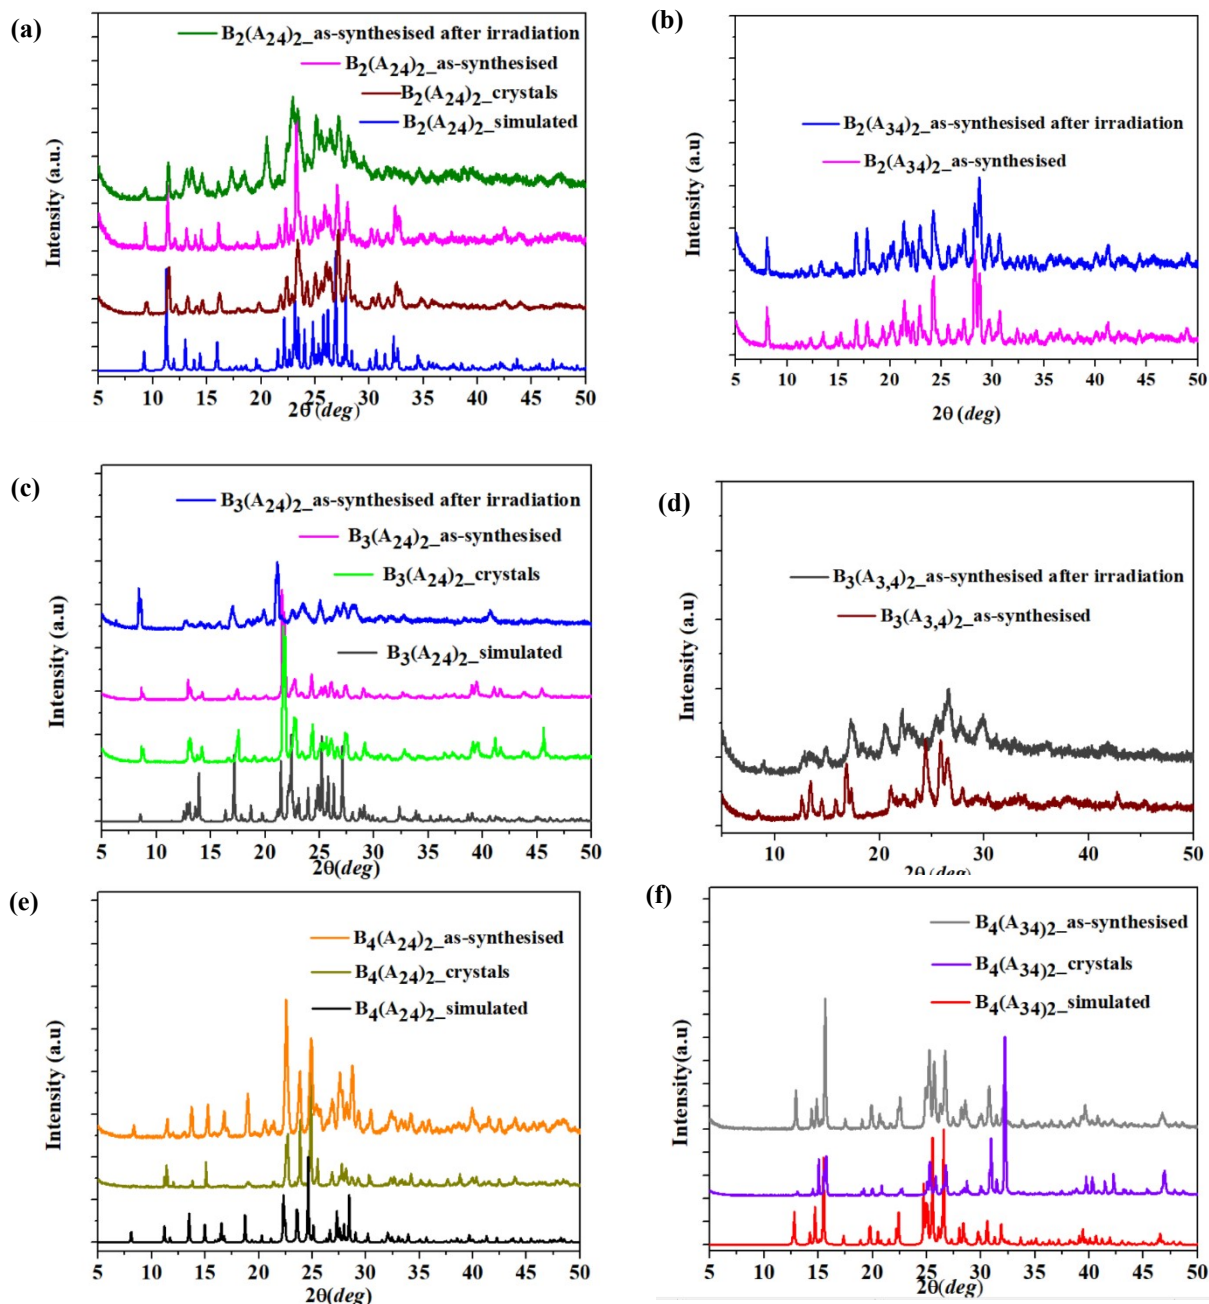

**Figure S2** PXRD analysis of as-synthesised salts with their single crystals grown. PXRD pattern after irradiation are given for  $B_2$  and  $B_3$  salts.

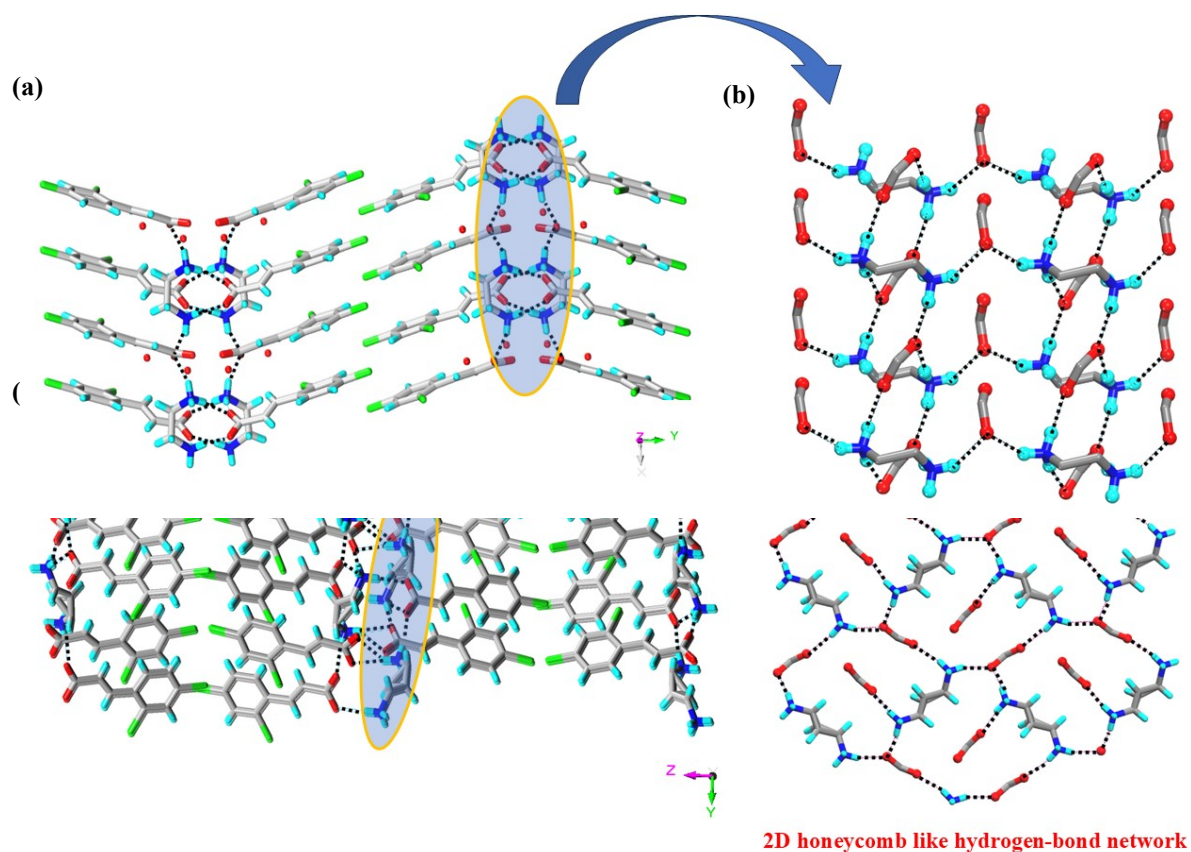

**Figure S3** Crystal structure illustration of  $B_2(A_{24})_2$  and  $B_3(A_{24})_2$  respectively; (a, c) overall 3D structure, (b, d) 2D hydrogen bonded layer.

**Table S3** Hydrogen bonding geometry in  $B_n(A_{m4})_2$  salts.

| Compound        | Type                     | H...A (Å) | D...A (Å) | D-H...A (°) |
|-----------------|--------------------------|-----------|-----------|-------------|
| $B_2(A_{24})_2$ | N(1)-H(1A)...O(1A)       | 1.93      | 2.808(7)  | 170         |
|                 | N(1)-H(1A)...O(2A)       | 2.51      | 3.187(7)  | 133         |
|                 | N(1)-H(1B)...O(2B)       | 2.05      | 2.848(7)  | 149         |
|                 | N(1)-H(1C)...O(1A)       | 1.94      | 2.810(7)  | 166         |
|                 | N(2)-H(2A)...O(1A)       | 2.58      | 3.203(7)  | 128         |
|                 | N(2)-H(2A)...O(1A)       | 1.99      | 2.872(7)  | 173         |
|                 | N(2)-H(2B)...O(2B)       | 2.02      | 2.791(6)  | 144         |
|                 | N(2)-H(2C)...O(2A)       | 1.88      | 2.765(6)  | 172         |
|                 | C(7A)-<br>H(7A)...Cl(1A) | 2.74      | 3.070(7)  | 102         |

|                   |                          |      |          |     |
|-------------------|--------------------------|------|----------|-----|
|                   | C(7B)-<br>H(7B)···Cl(1B) | 2.62 | 3.031(7) | 108 |
|                   |                          |      |          |     |
| $B_3(A_{24})_2$   | N(1)-H(1A)···O(3)        | 1.86 | 2.711(7) | 159 |
|                   | N(2)-H(2A)···O(3)        | 1.96 | 2.833(7) | 166 |
|                   | N(2)-H(2A)···O(4)        | 2.43 | 3.121(7) | 135 |
|                   | N(2)-H(2B)···O(2)        | 1.96 | 2.809(7) | 159 |
|                   | N(2)-H(2C)···O(1)        | 2.08 | 2.951(7) | 165 |
|                   | N(2)-H(2C)···O(4)        | 2.54 | 2.858(7) | 102 |
|                   | C(3)-H(3)···Cl(1)        | 2.60 | 3.054(7) | 111 |
|                   | C(12)-H(12)···Cl(3)      | 2.63 | 3.077(7) | 110 |
|                   |                          |      |          |     |
| $d-B_2(A_{24})_2$ | N(1)-H(1A)···O(3)        | 2.09 | 2.882(4) | 148 |
|                   | N(1)-H(1A)···O(4)        | 2.48 | 3.300(4) | 153 |
|                   | N(1)-H(1B)···O(2)        | 1.95 | 2.759(4) | 150 |
|                   | N(1)-H(1C)···O(3)        | 1.97 | 2.851(4) | 169 |
|                   | N(2)-H(2A)···O(4)        | 2.00 | 2.882(4) | 172 |
|                   | N(2)-H(2B)···O(4)        | 2.02 | 2.879(4) | 163 |
|                   | N(2)-H(2C)···O(1)        | 1.90 | 2.746(4) | 157 |
|                   | C(13)-H(13)···Cl(1)      | 2.60 | 3.119(4) | 114 |
|                   | C(13)-H(13)···O(3)       | 2.46 | 2.878(4) | 105 |
|                   | C(19)-H(19B)···O(2)      | 2.60 | 3.240(4) | 124 |
|                   | C(20)-H(20B)···O(1)      | 2.42 | 3.187(5) | 135 |
|                   |                          |      |          |     |
| $d-B_3(A_{24})_2$ | N(1)-H(1A)···O(2)        | 1.89 | 2.737(4) | 159 |
|                   | N(1)-H(1B)···O(4)        | 1.98 | 2.834(4) | 160 |
|                   | N(1)-H(1C)···O(4)        | 2.06 | 2.943(4) | 174 |
|                   | N(2)-H(2A)···O(3)        | 1.92 | 2.769(4) | 159 |
|                   | N(2)-H(2B)···O(1)        | 1.88 | 2.745(4) | 163 |
|                   | N(2)-H(2B)···O(2)        | 2.53 | 2.974(4) | 112 |

|                 |                      |      |          |     |
|-----------------|----------------------|------|----------|-----|
|                 | N(2)-H(2C)···O(3)    | 2.52 | 3.179(4) | 131 |
|                 | N(2)-H(2C)···O(4)    | 2.09 | 2.975(4) | 172 |
|                 | C(11)-H(11)···O(3)   | 2.54 | 2.912(5) | 102 |
|                 | C(19)-H(19A)···O(1)  | 2.53 | 3.262(4) | 133 |
|                 |                      |      |          |     |
|                 |                      |      |          |     |
| $B_4(A_{24})_2$ | N(1)-H(1A)···O(2)    | 2.00 | 2.829(3) | 155 |
|                 | N(1)-H(1B)···O(2)    | 1.92 | 2.771(3) | 158 |
|                 | N(1)-H(1C)···O(1)    | 1.85 | 2.736(3) | 174 |
|                 | C(2)-H(2)···Cl(1)    | 2.64 | 3.068(3) | 109 |
|                 | C(2)-H(2)···O(1)     | 2.53 | 2.840(3) | 100 |
|                 | C(8)-H(8)···O(2)     | 2.46 | 3.362(3) | 164 |
|                 | C(10)-H(10B)···Cl(2) | 2.92 | 3.682    | 136 |
| $B_4(A_{34})_2$ | N(1)-H(1A)···O(1)    | 1.91 | 2.787(3) | 168 |
|                 | N(1)-H(1A)···O(2)    | 2.59 | 3.286(3) | 135 |
|                 | N(1)-H(1B)···O(1)    | 2.01 | 2.771(4) | 143 |
|                 | N(1)-H(1C)···O(2)    | 1.88 | 2.749(4) | 166 |
|                 | C(7)-H(7)···O(1)     | 2.53 | 2.848(4) | 100 |
|                 | C(10)-H(10B)···Cl(1) | 2.97 | 3.804    | 145 |
|                 |                      |      |          |     |

**Table S3.** List of Cl···Cl interactions parameters.

| Compound          | Cl···Cl (Å) | <C-Cl···Cl (Å) | Type of Cl···Cl |
|-------------------|-------------|----------------|-----------------|
| $B_2(A_{24})_2$   | 3.970       | 150, 93        | Type-II         |
| $B_3(A_{24})_2$   | 3.721       | 103, 82        | Type-II         |
| $d-B_2(A_{24})_2$ | 4.055       | 101, 68        | Type-II         |
|                   | 4.095       | 134, 134       | Type-I          |
| $d-B_2(A_{34})_2$ | 3.660       | 125, 125       | Type-I          |
|                   | 3.993       | 115, 66        | Type-II         |

**Table S4** Gelation Data.

| Salts                                          | Solvents            |                  |                            |                    |
|------------------------------------------------|---------------------|------------------|----------------------------|--------------------|
|                                                | DMSO                | H <sub>2</sub> O | DMSO-H <sub>2</sub> O(1:1) | Ph-NO <sub>2</sub> |
| B <sub>2</sub> (A <sub>24</sub> ) <sub>2</sub> | G (12) <sup>†</sup> | TS               | G (10)                     | G (20)             |
| B <sub>2</sub> (A <sub>34</sub> ) <sub>2</sub> | G (15)              | TS               | G (10)                     | WG                 |
| B <sub>3</sub> (A <sub>24</sub> ) <sub>2</sub> | WG                  | TS               | G (10)                     | WG                 |
| B <sub>3</sub> (A <sub>34</sub> ) <sub>2</sub> | WG                  | TS               | G (10)                     | WG                 |

*G* = gel (<sup>†</sup> CGC in mg ml<sup>-1</sup>); *TS* = turbid solution; *WG* = weak gel

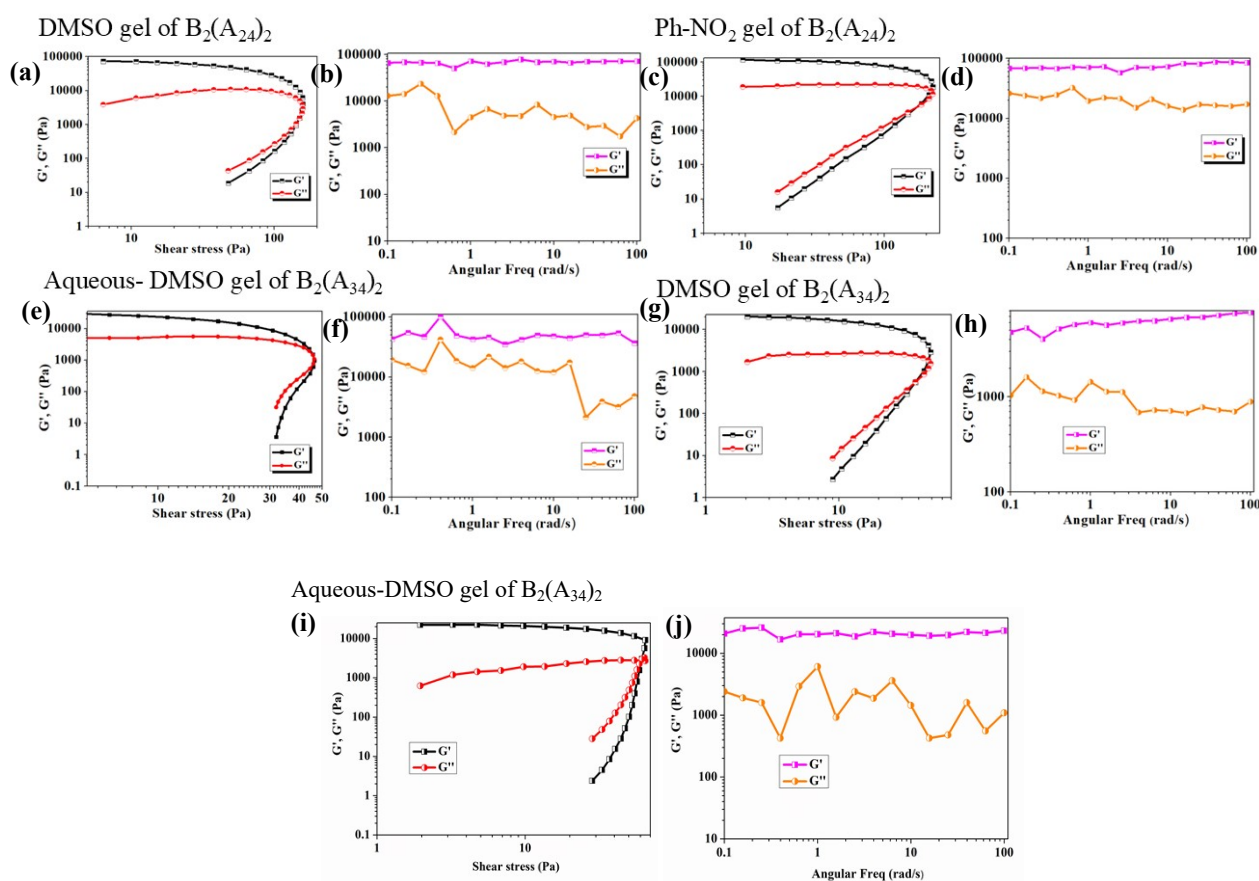

**Figure S4** Illustration of the rheological analyses of organogels: variation of storage modulus (*G'*) and loss modulus (*G''*), (a,c,e,g,i,k) with shear stress; (b,d,f,h,j,l) with frequency.

## FESEM images

### Aqueous DMSO gel

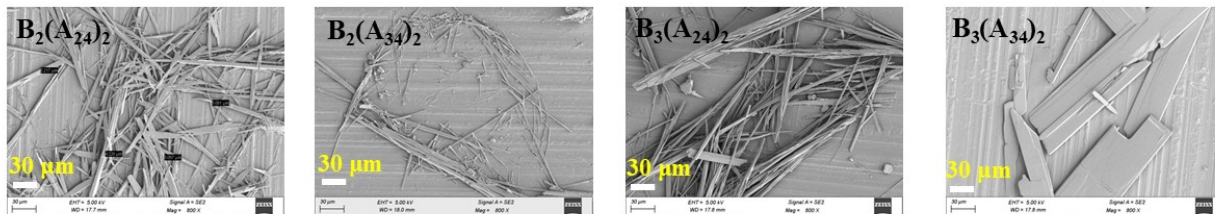

### Ph-NO<sub>2</sub> gel

### DMSO gel

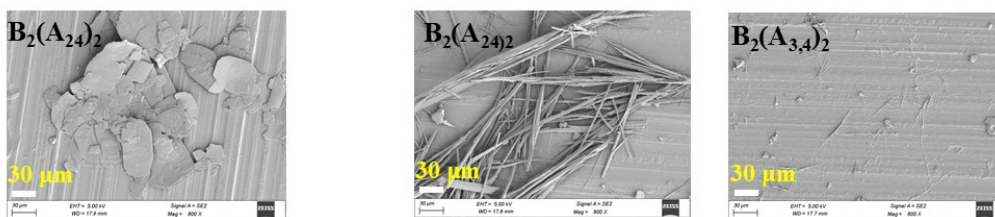

Figure S5 FESEM images showing different morphologies (popsicle stick or plate shaped) for organogels.

## PXRD analysis

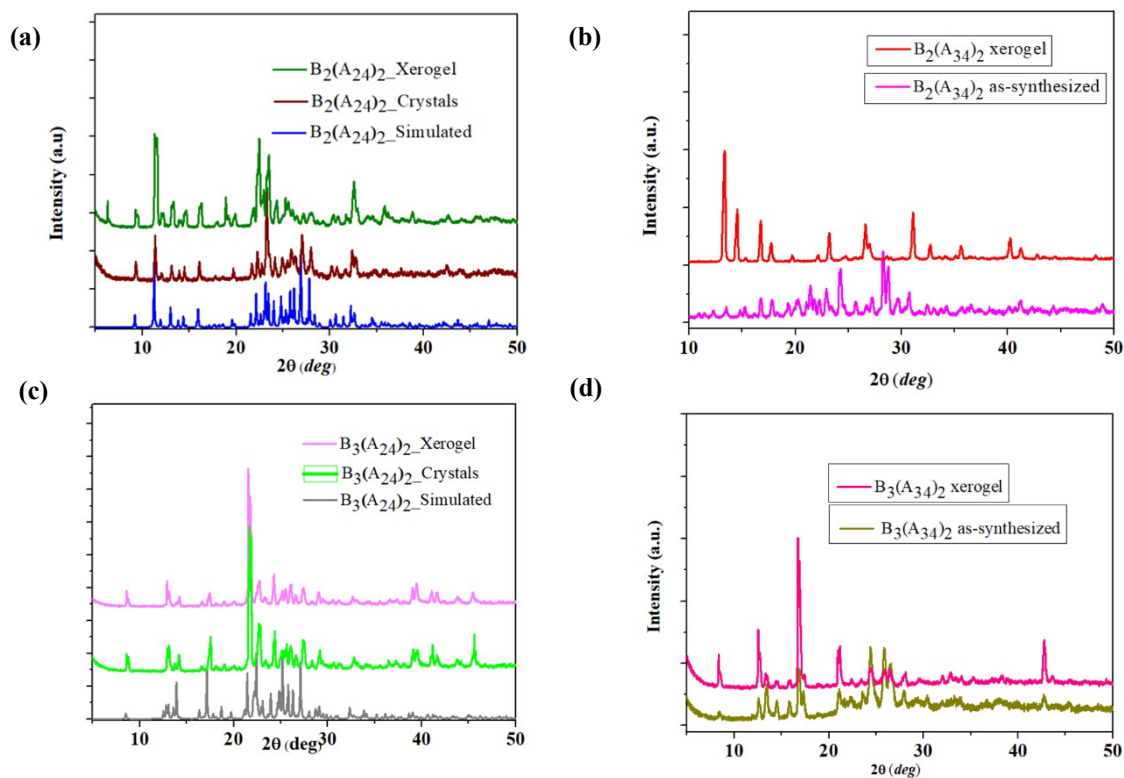

Figure S6 PXRD analysis of crystals and xerogel from aqueous DMSO gel of B<sub>2</sub> and B<sub>3</sub> salts.

## $^1\text{H-NMR}$ Spectra

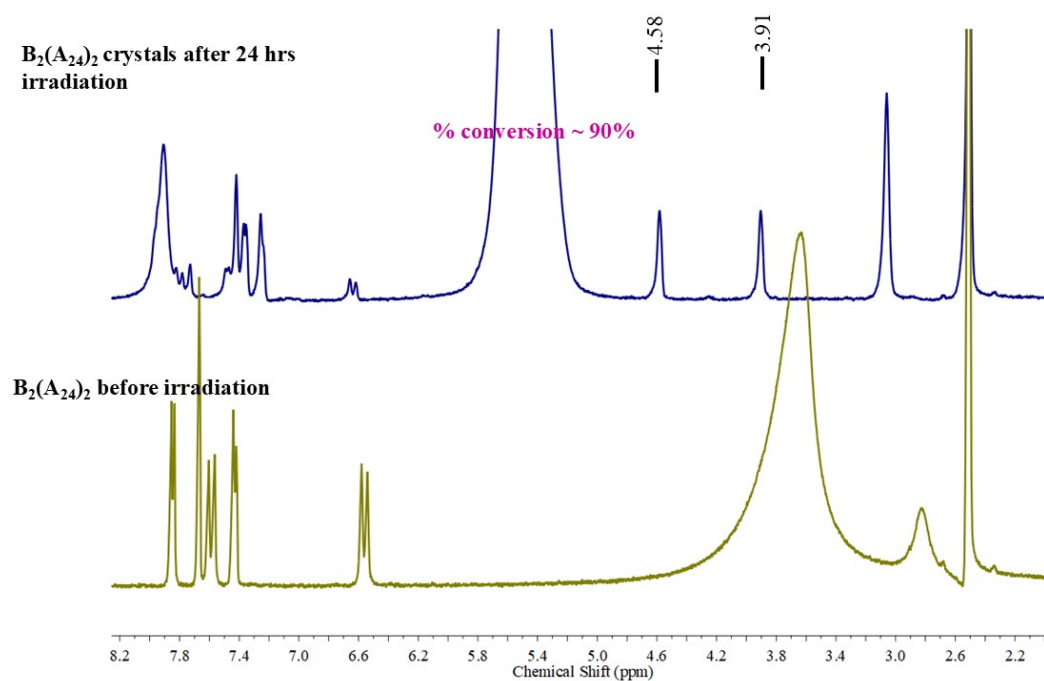

Figure S7  $^1\text{H-NMR}$  spectra for  $\text{B}_2(\text{A}_{24})_2$  before and after 24 hrs of 365 nm UV irradiation (400MHz,  $\text{DMSO-d}_6$ ).

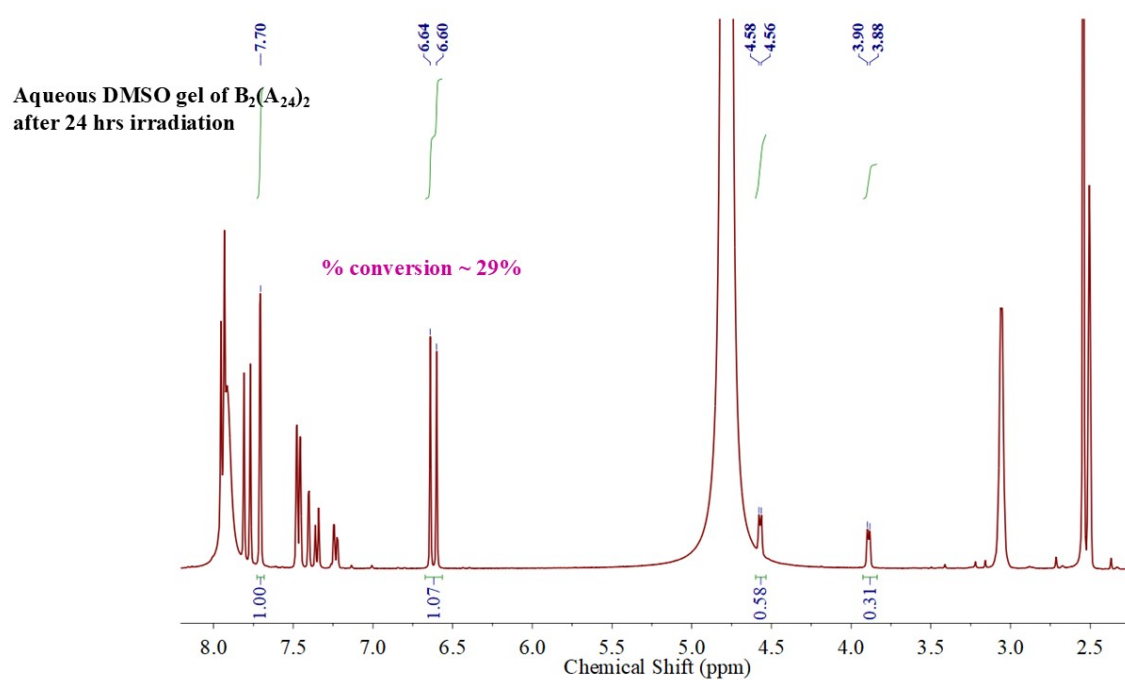

Figure S8  $^1\text{H-NMR}$  spectra for aqueous  $\text{DMSO}$  gel of  $\text{B}_2(\text{A}_{24})_2$  after 24 hrs of 365 nm UV irradiation (400MHz,  $\text{DMSO-d}_6$ ).

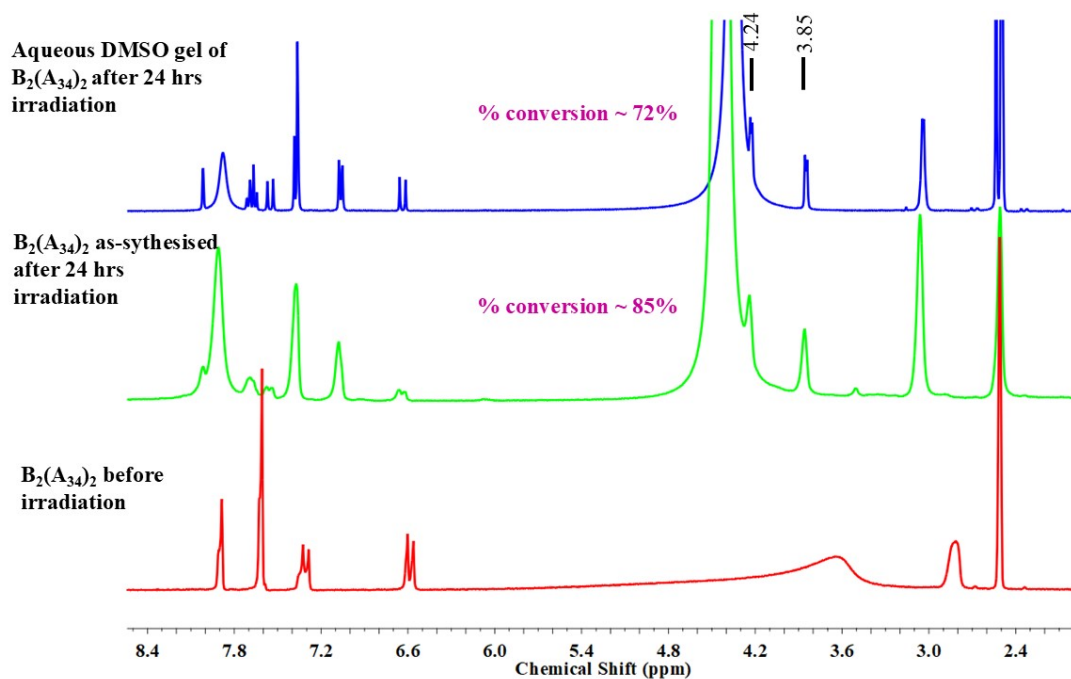

**Figure S9**  $^1\text{H}$ NMR spectra for  $B_2(A_{34})_2$  in crystal and organogel state before and after 24 hrs of 365 nm UV irradiation (400MHz,  $\text{DMSO-}d_6$ ).

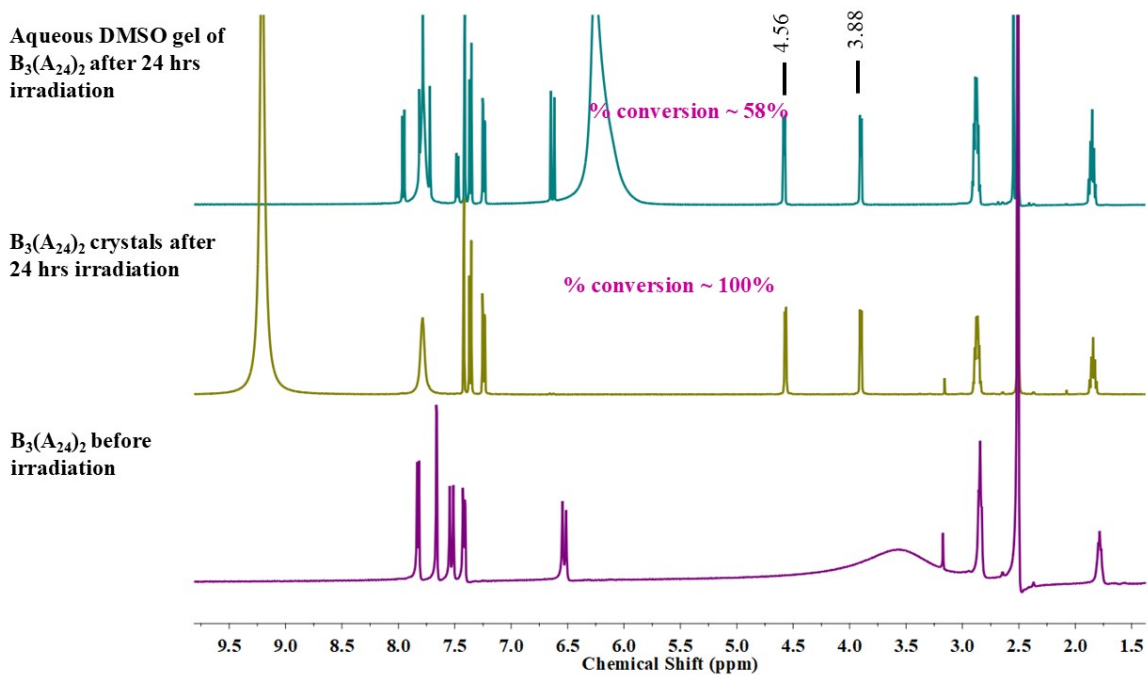

**Figure S10**  $^1\text{H}$ NMR spectra for  $B_3(A_{24})_2$  in crystal and organogel state before and after 24 hrs of 365 nm UV irradiation (400MHz,  $\text{DMSO-}d_6$ ).

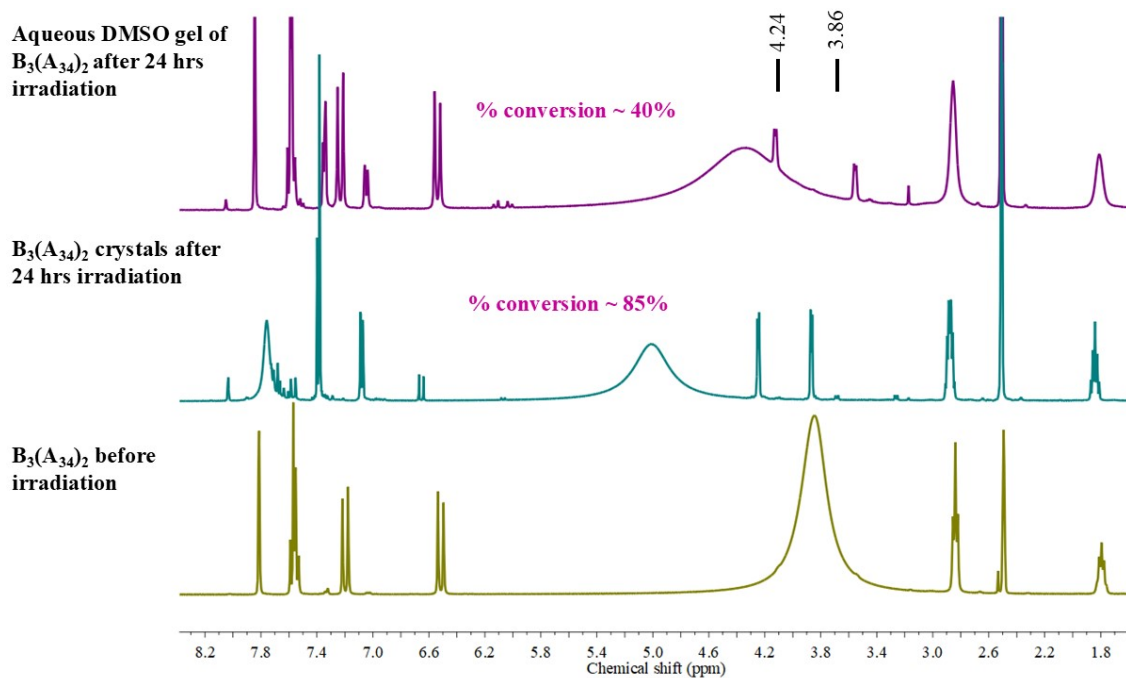

**Figure S11**  $^1\text{H}$ NMR spectra for  $B_3(A_{34})_2$  in crystal and organogel state before and after 24 hrs of 365 nm UV irradiation (400MHz,  $\text{DMSO-}d_6$ ).

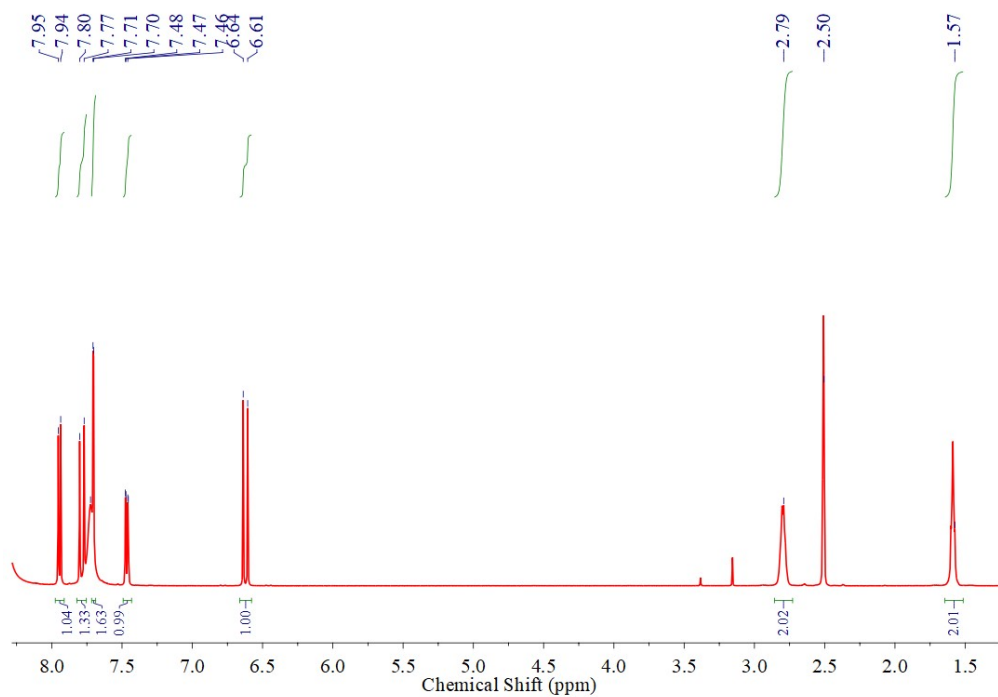

**Figure S12**  $^1\text{H}$ NMR spectrum for  $B_4(A_{24})_2$  (400MHz,  $\text{DMSO-}d_6$ ).

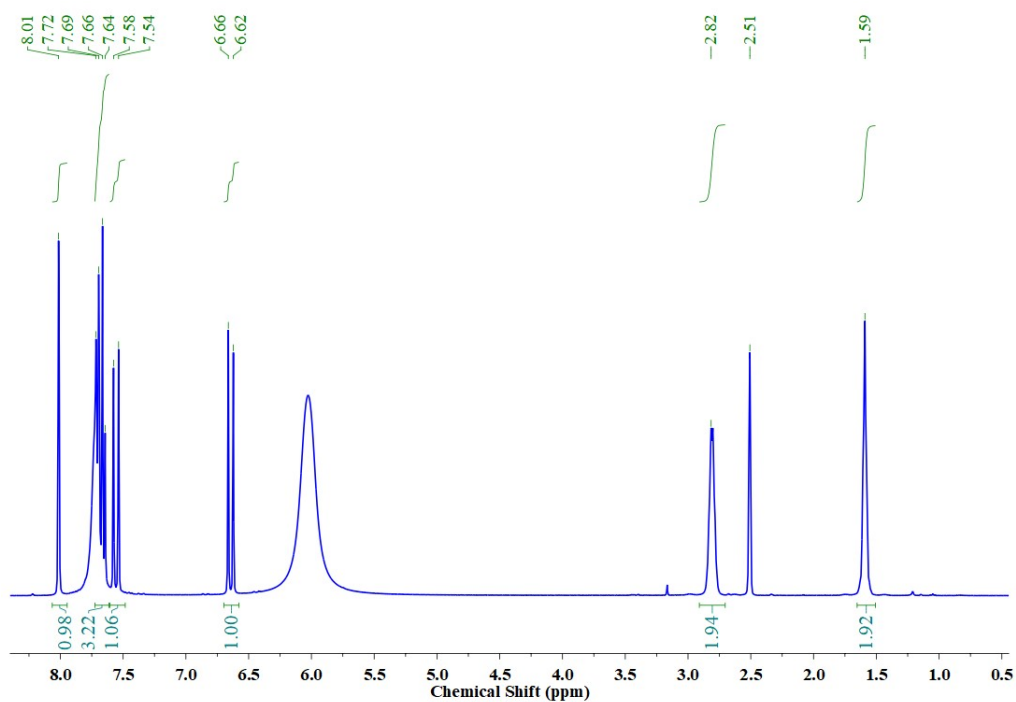

Figure S13  $^1\text{H}$ NMR spectrum for  $\text{B}_4(\text{A}_{34})_2$  (400MHz,  $\text{DMSO-}d_6$ ).

### MALDI-ToF analysis

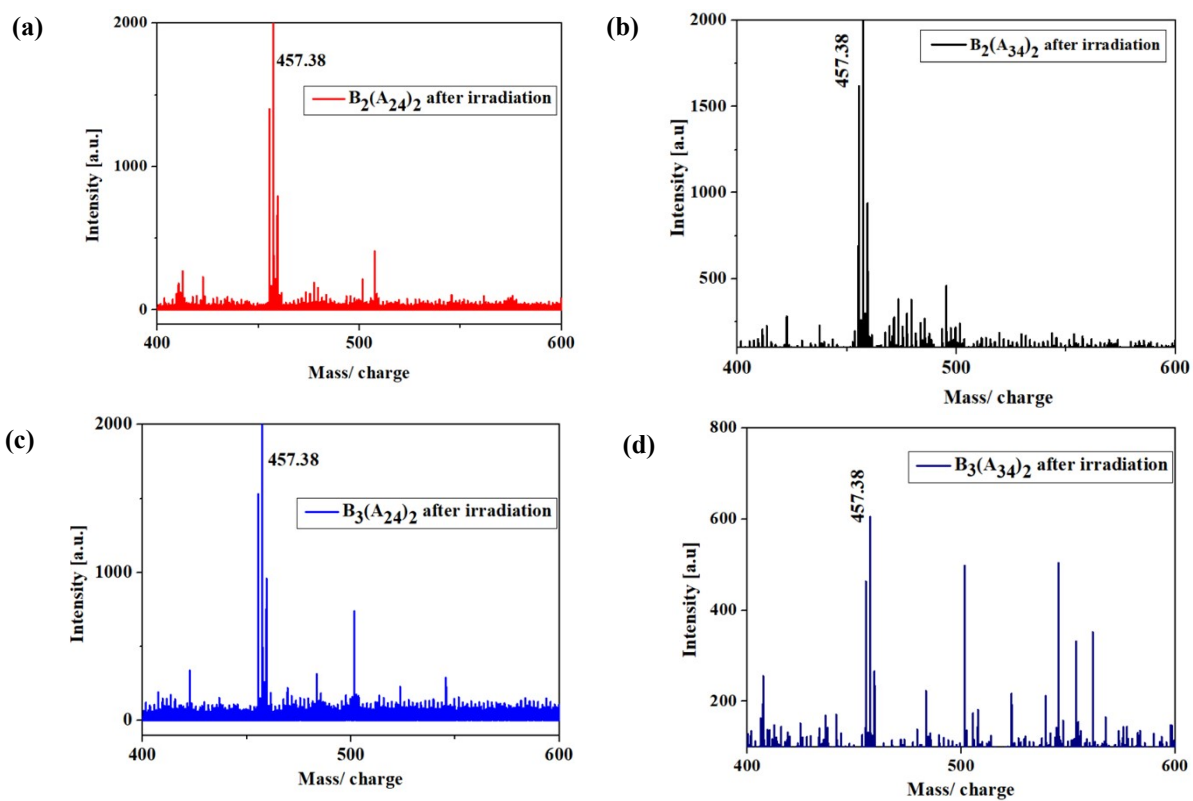

Figure S14 MALDI-ToF analysis after photoirradiation of various salts.

## Optical Microscope image

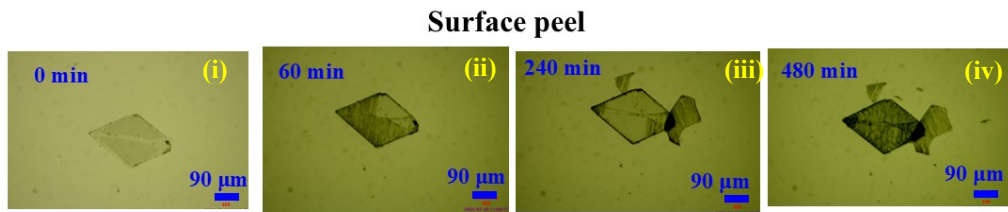

**Figure S15** Optical microscopic images of  $B_3(A_{24})_2$  crystal at different time intervals indicating surface peeling effect.

## FESEM images:

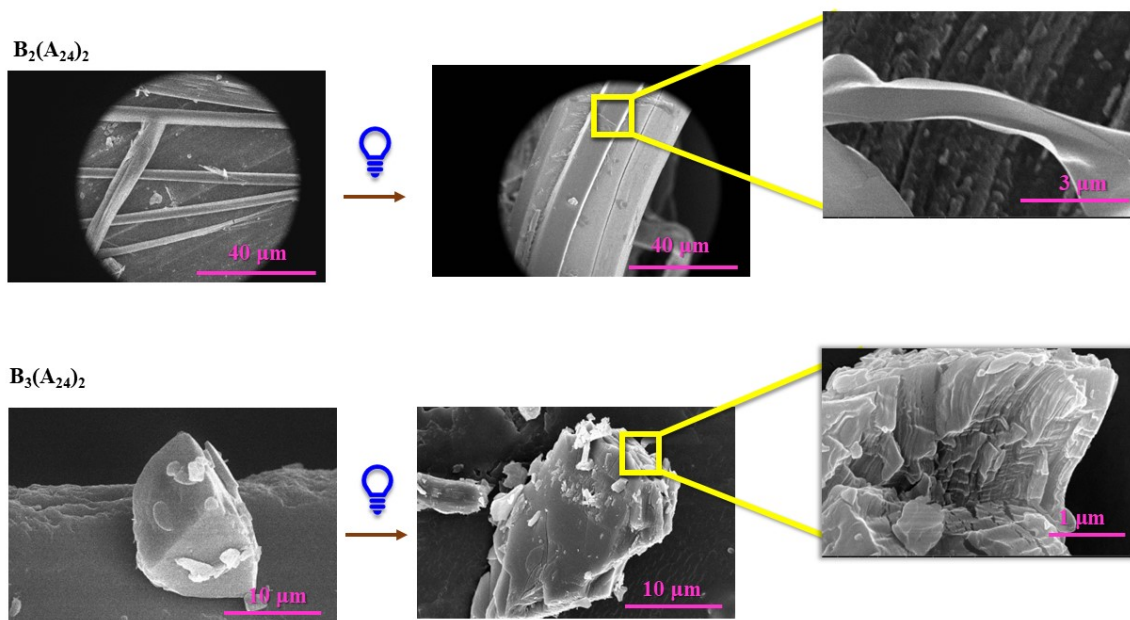

**Figure S16** FESEM images indicating (a) bending in  $B_2(A_{24})_2$  and (b) development of cracks in  $B_3(A_{24})_2$ .

**AFM images:**

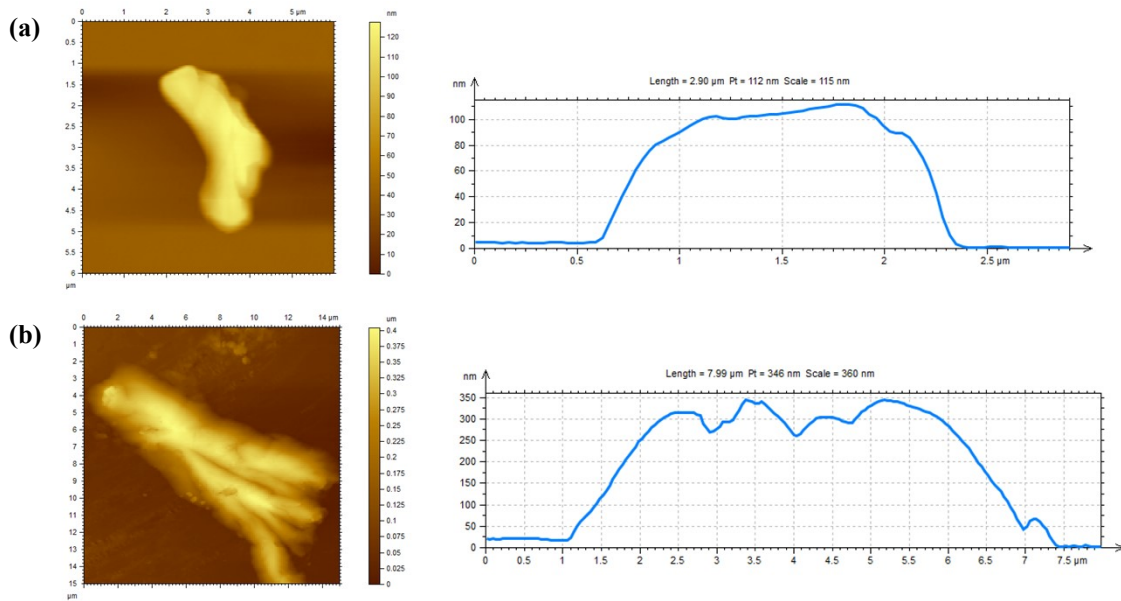

**Figure S17** AFM images and height profile of  $B_3(A_{24})_2$  from left to right for (a) before and (b) after irradiation.

*p-h* curve

(a)

$B_2(A_{24})_2$

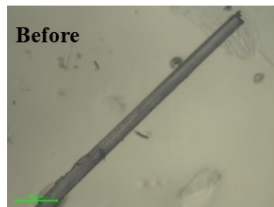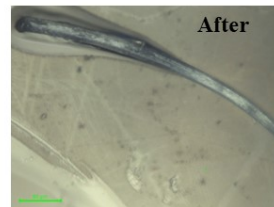

| Load/ $\mu\text{N}$ | Modulus /GPa | Hardness/ GPa |
|---------------------|--------------|---------------|
| 775.9512            | 10.86044     | 0.70017       |
| 718.0948            | 12.68981     | 0.590208      |
| 562.4395            | 9.698153     | 0.463128      |

| Load/ $\mu\text{N}$ | Modulus /GPa | Hardness/ GPa |
|---------------------|--------------|---------------|
| 27.4886             | 0.224116     | 0.04833       |
| 67.58036            | 0.543126     | 0.155956      |
| 35.89612            | 0.306192     | 0.159558      |

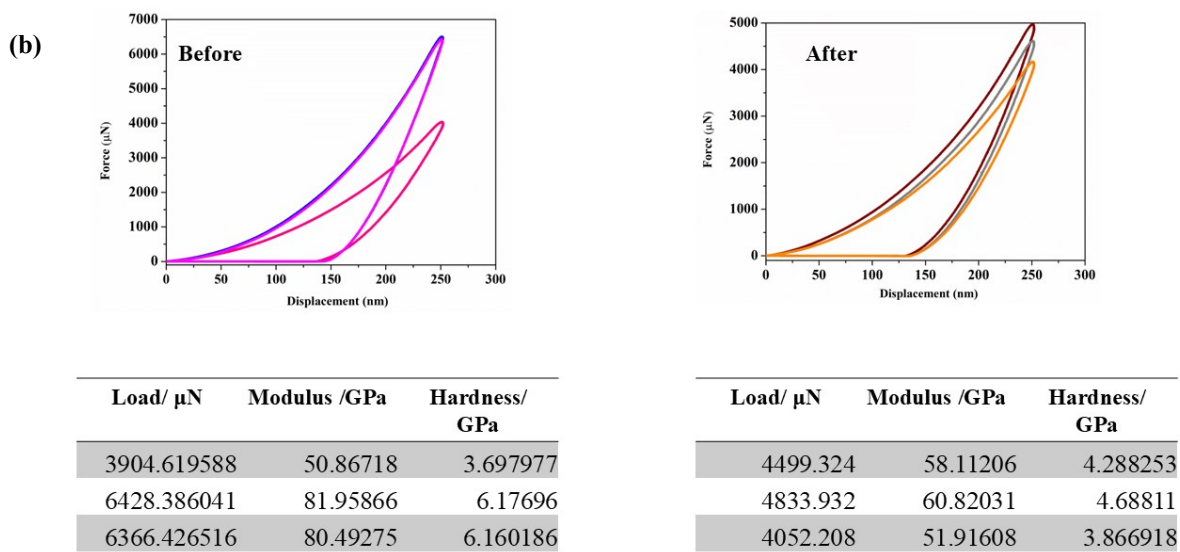

**Figure S18** (a) The modulus and hardness based on nanoindentation before and after irradiation for  $\text{B}_2(\text{A}_{24})_2$ ; (b) Load-depth ( $P-h$ ) curve for  $\text{B}_3(\text{A}_{24})_2$ .

**Table S5** Values of  $H$  (hardness) of various mechanophotonics.

| Crystal/Material                                                                        | Mechanical Property                                                                      | Hardness (GPa) | Reference                                          |
|-----------------------------------------------------------------------------------------|------------------------------------------------------------------------------------------|----------------|----------------------------------------------------|
| Ethylenediamine salt of <i>trans</i> -dichlorocinnamates                                | Plastic bending due to photodimerization                                                 | 0.47           | This work                                          |
| 1,1'-dioxo-1H,1'H-[2,2'-biindene]-3,3'-diyl-bis-(decanoate) and its polymerised crystal | Elastic to elastic/plastic bending due to photopolymerization with mechanical stiffening | ~0.1-~0.3      | <i>J. Am. Chem. Soc.</i> 2025, <b>147</b> , 41034. |
| 1,3-diamino-2,4,5,6-tetrabromobenzene                                                   | Elastic bending                                                                          | 0.48           | <i>J. Mater. Chem. C</i> , 2021, <b>9</b> , 9465   |
| <i>N,N'</i> -bis(4-nitrophenyl)methanediamine                                           | Elastic or Elasto-plastic bending, ductile fracture                                      | 0.2            | <i>Chem</i> , 2024; <b>10</b> , 1741.              |
| Isomorphous thiophen-bis(trifluoromethyl)-prop-2-enenitrile                             | Plastic bending or elastic/plastic bending due to photodimerization                      | ~0.1-~0.2      | <i>Chem. Mater.</i> 2024, <b>36</b> , 8338         |

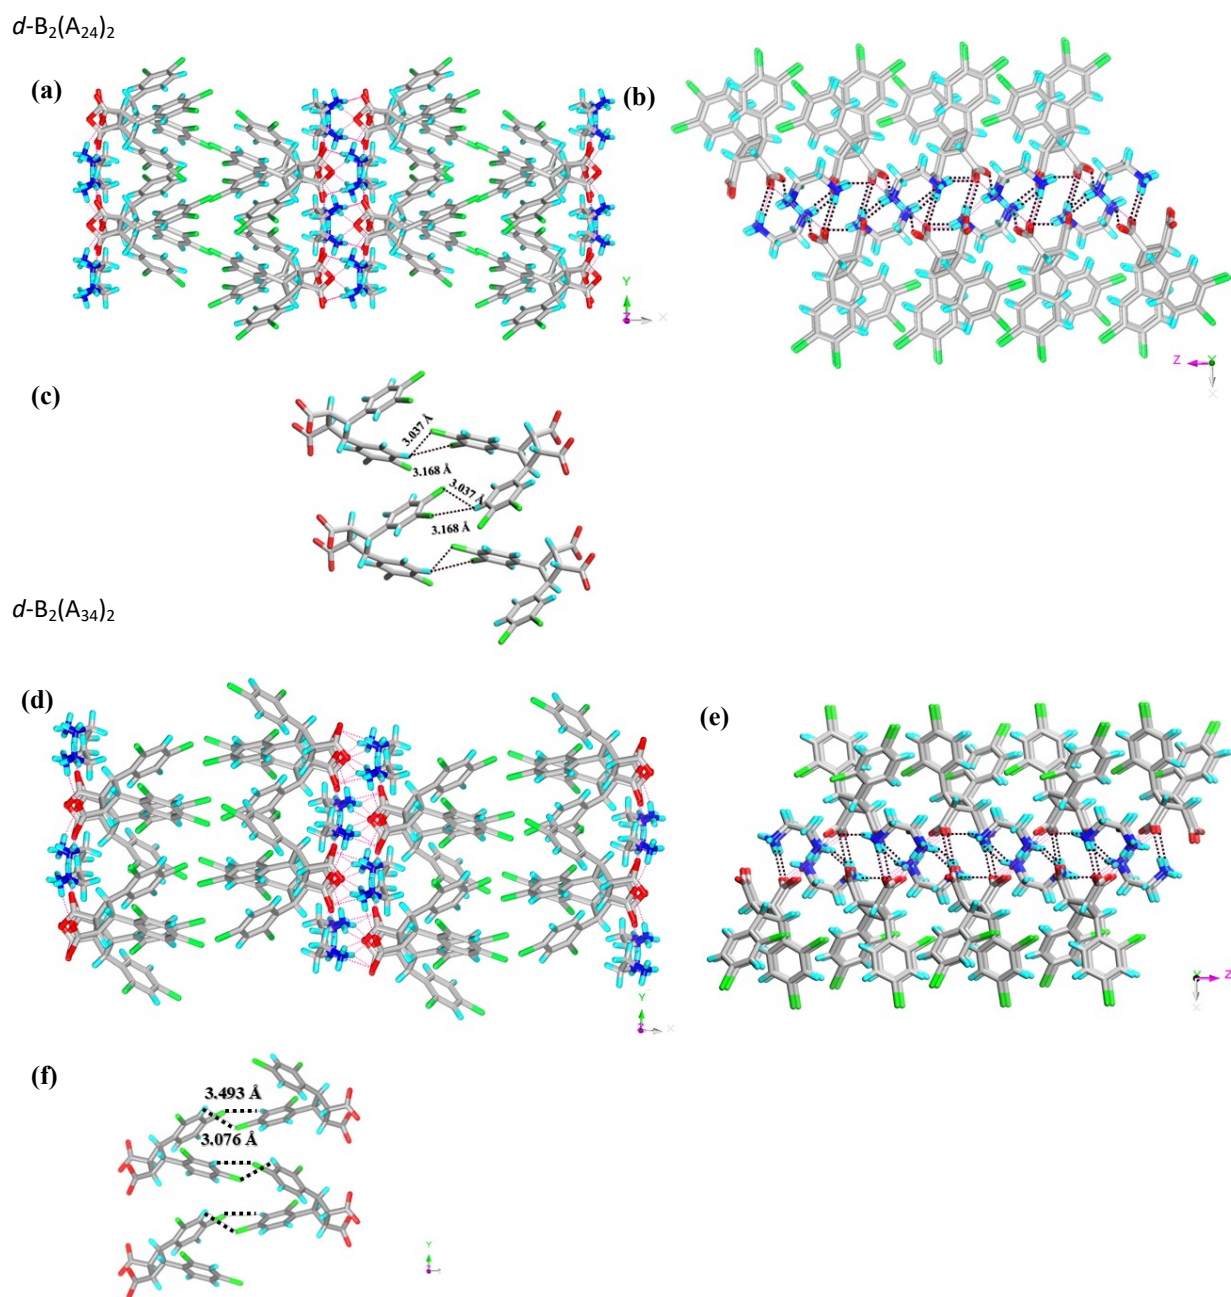

**Figure S19** Crystal structure illustration for  $d\text{-B}_2(\text{A}_{24})_2$  and  $d\text{-B}_2(\text{A}_{34})_2$ ; (a, d) bilayered 2D hydrogen bonded network (side view), (b, d) top view of 2D HBN, (c, f) C-H...Cl interactions.

## PL Spectra

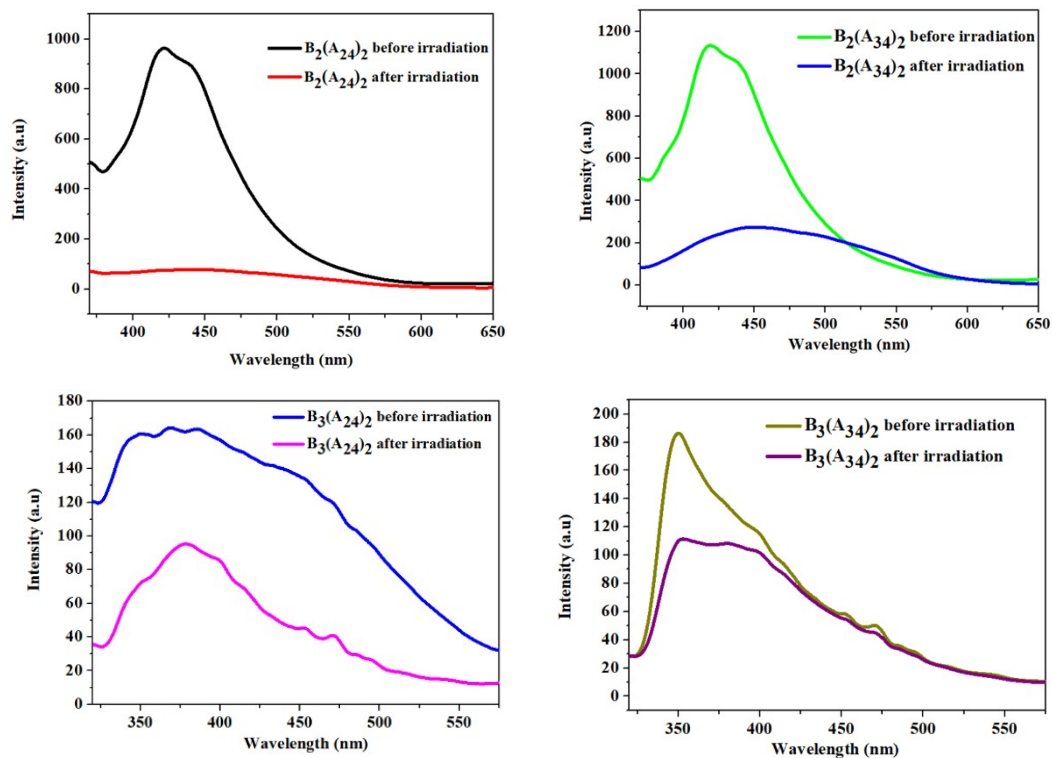

**Figure S20** Solid-state PL spectra before and after UV irradiation showing reduced emission.

TGA data after  $I_2$  adsorption.

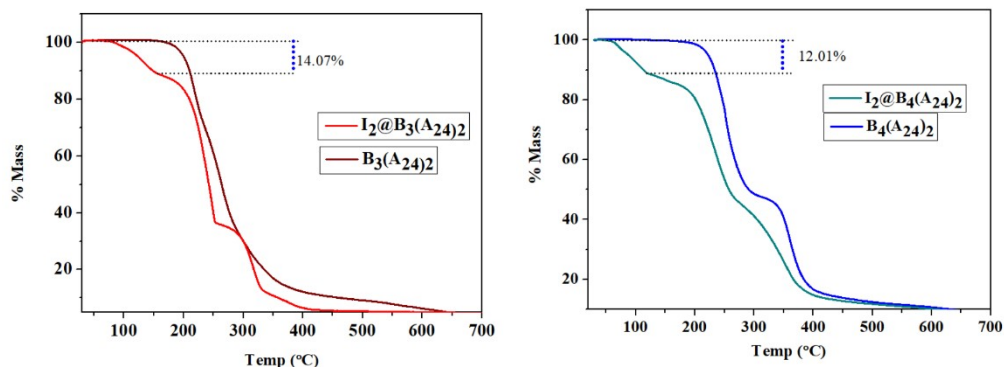

**Figure S21** Thermogravimetric analysis for  $B_3(A_{24})_2$  and  $B_4(A_{24})_2$  after  $I_2$  adsorption.

# XPS Spectra

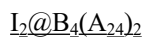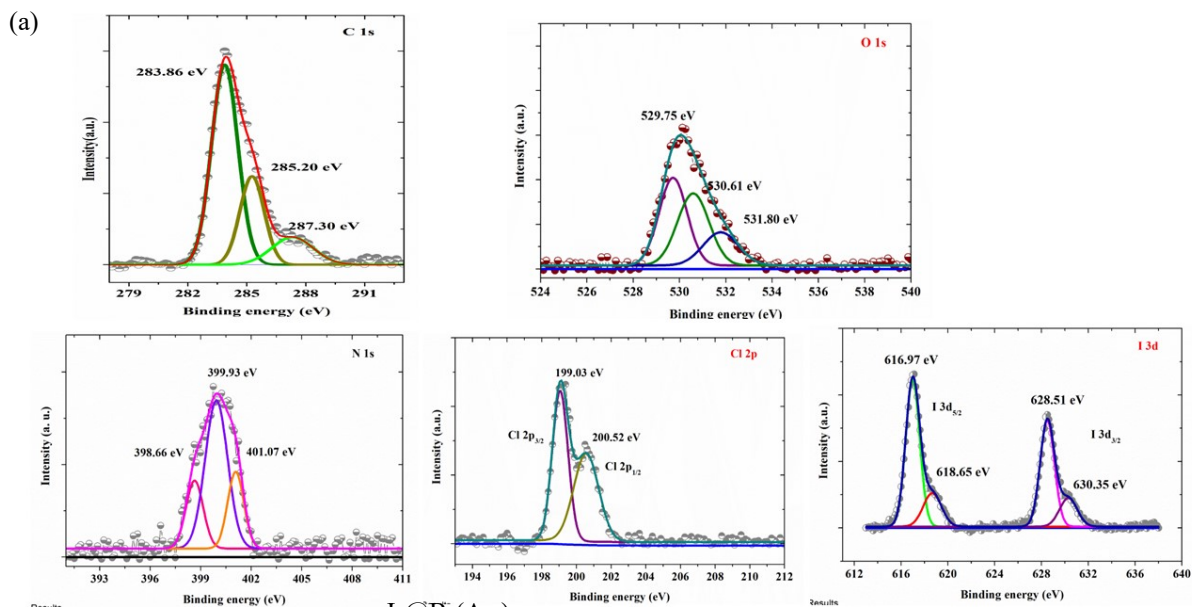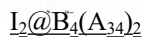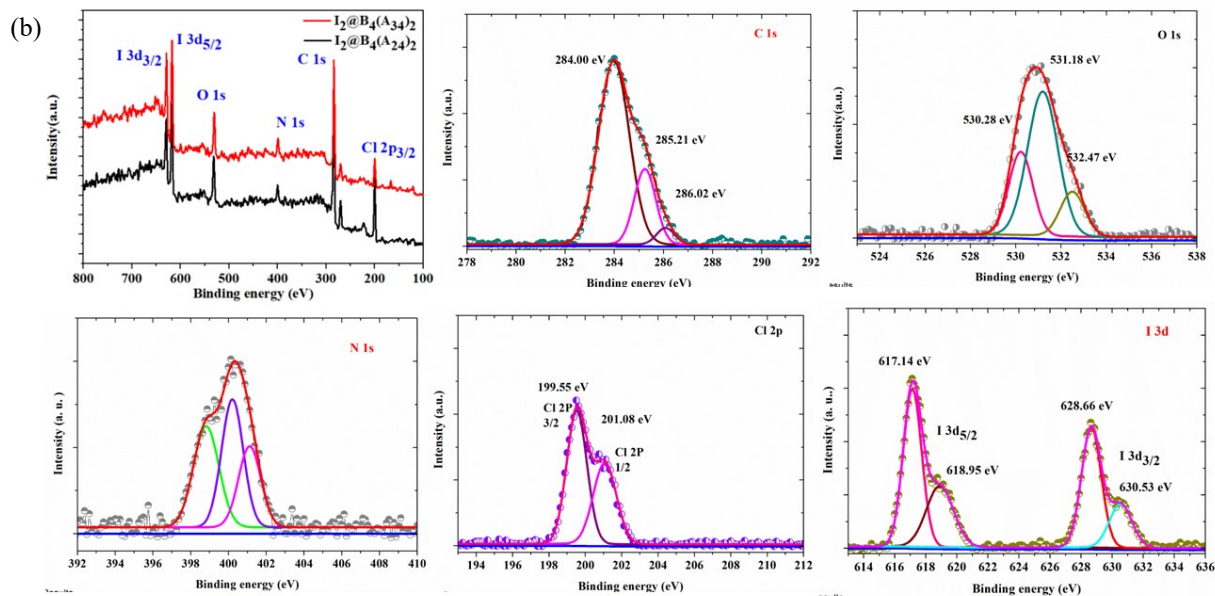

Figure S22 XPS spectra for  $B_4$  salts after  $I_2$  adsorption.

EDX analysis

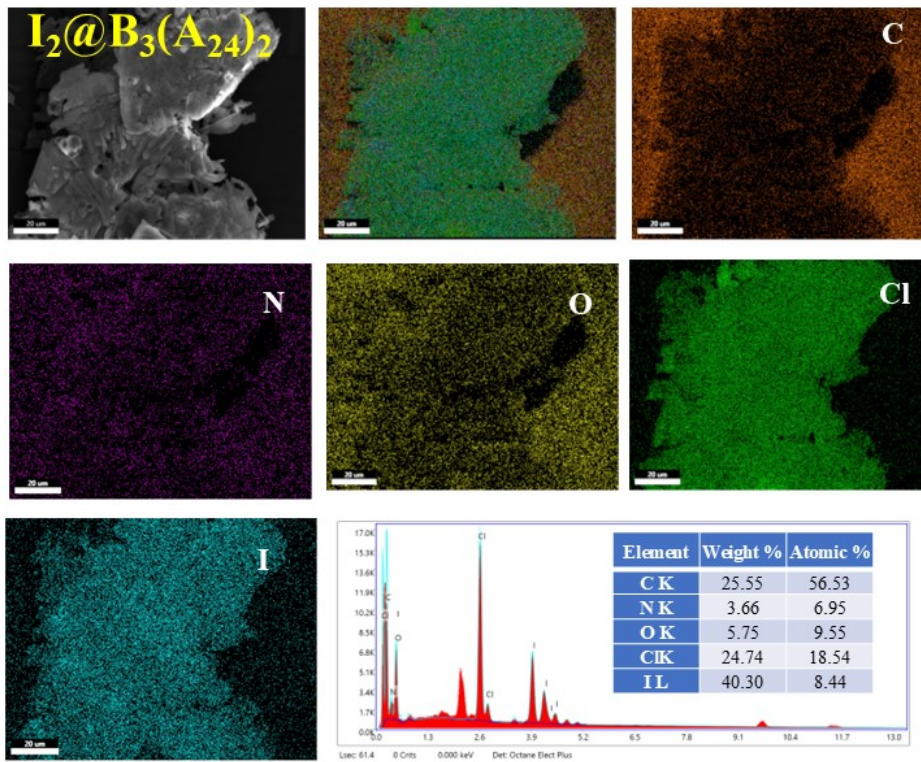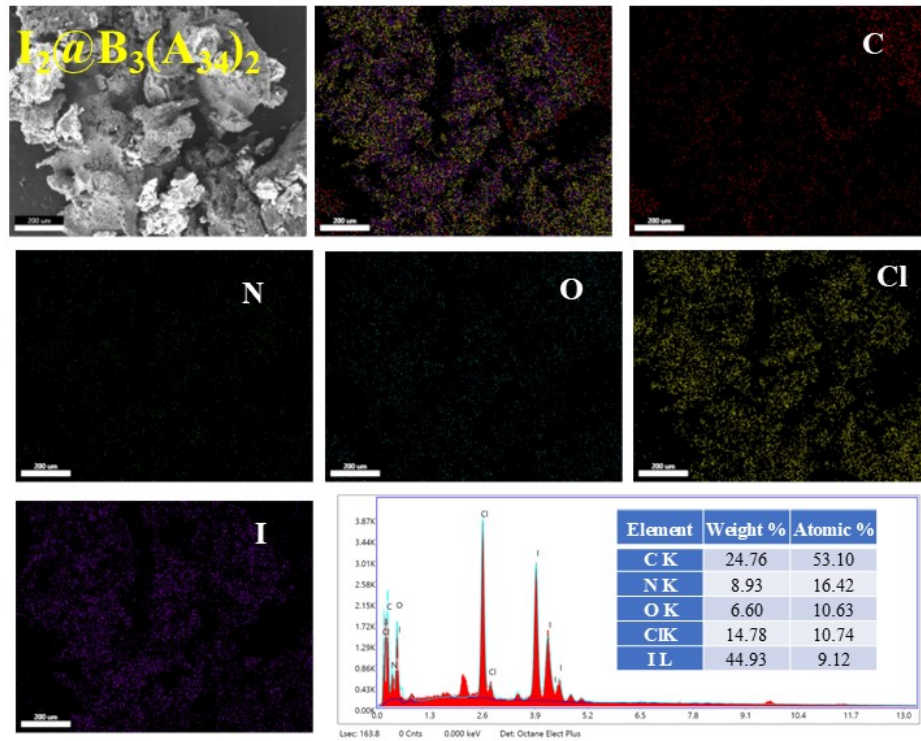

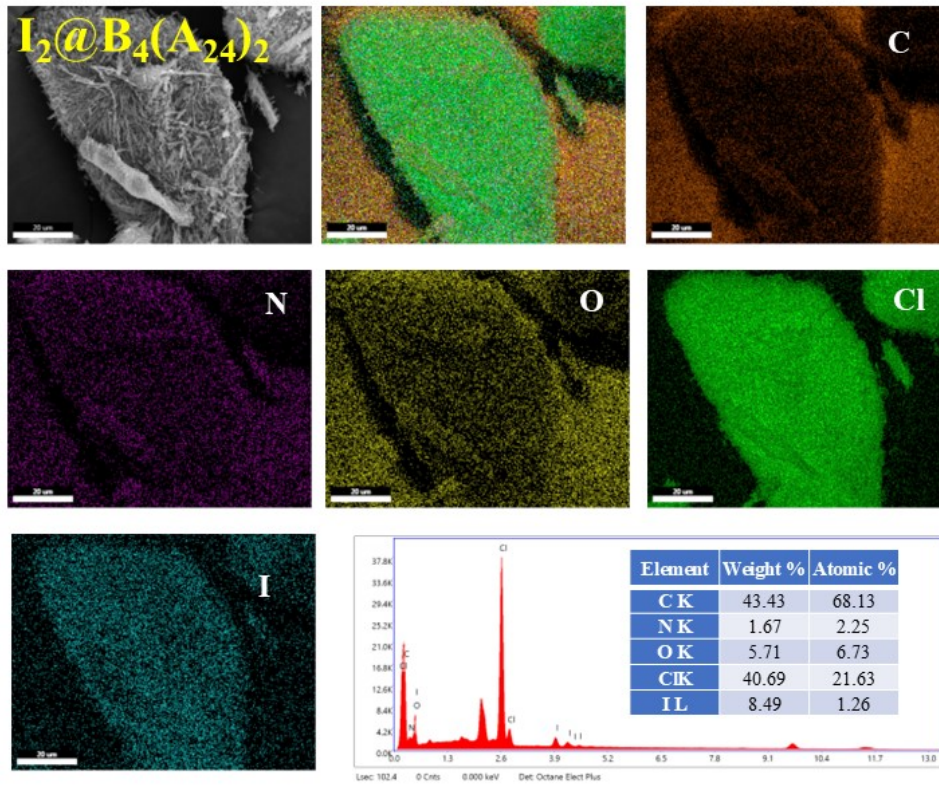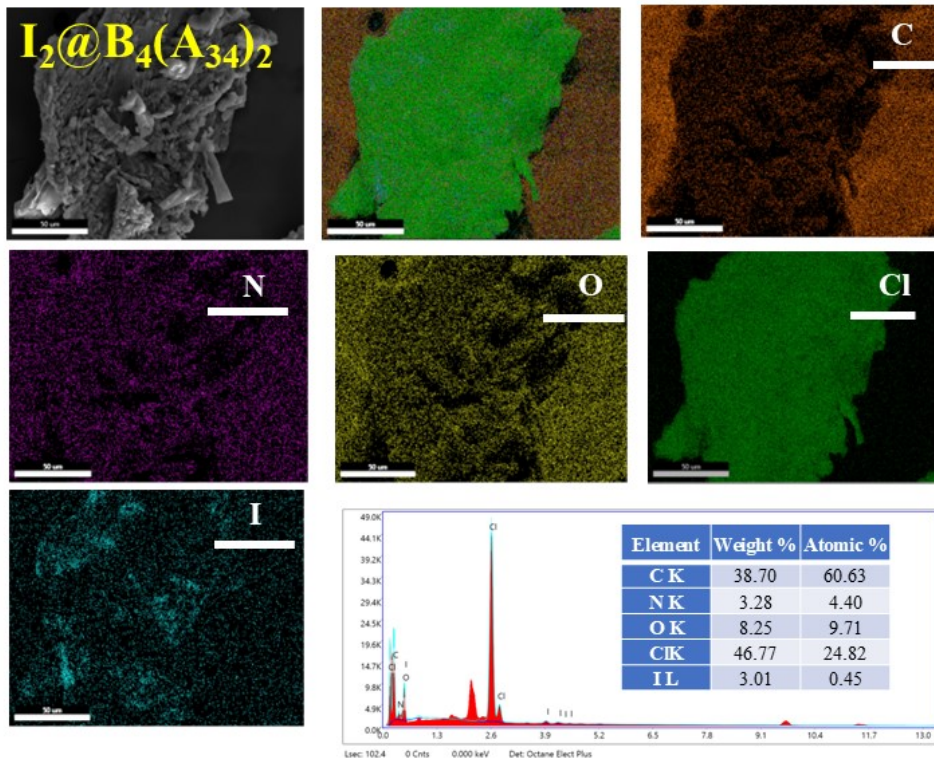

**Figure S23** EDX analysis and elemental mapping of different salts after  $I_2$  adsorption.

### FTIR Spectra

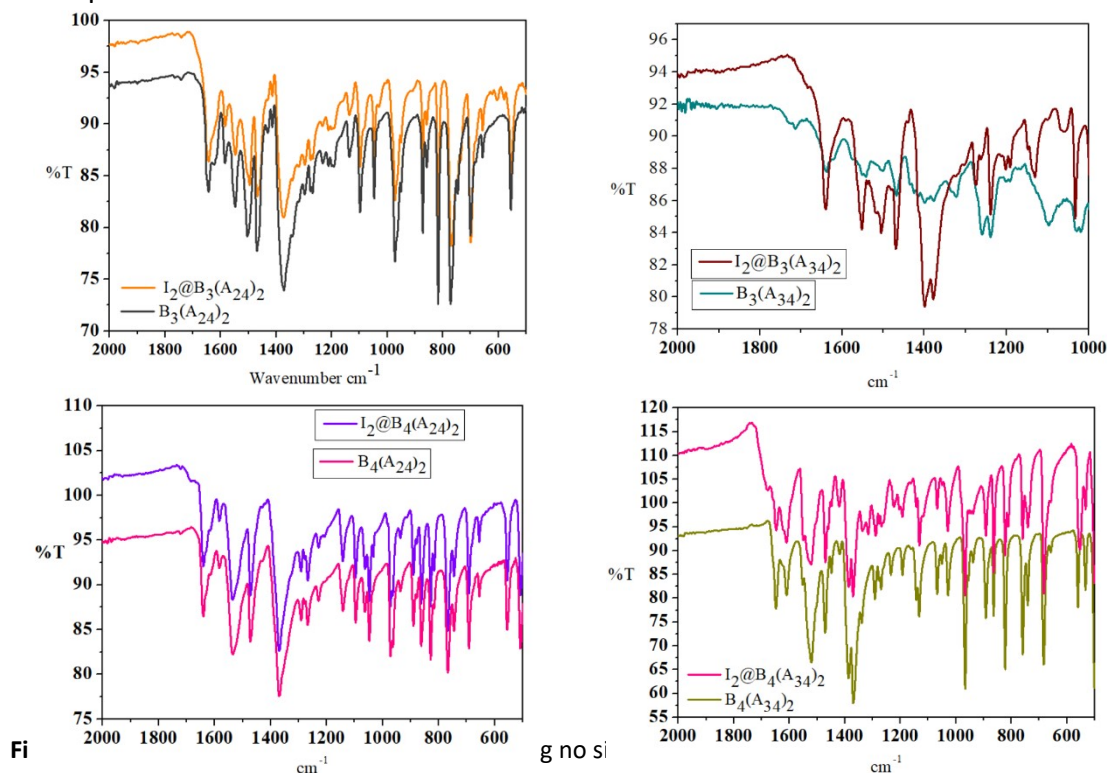

### PXRD analysis after $\text{I}_2$ adsorption

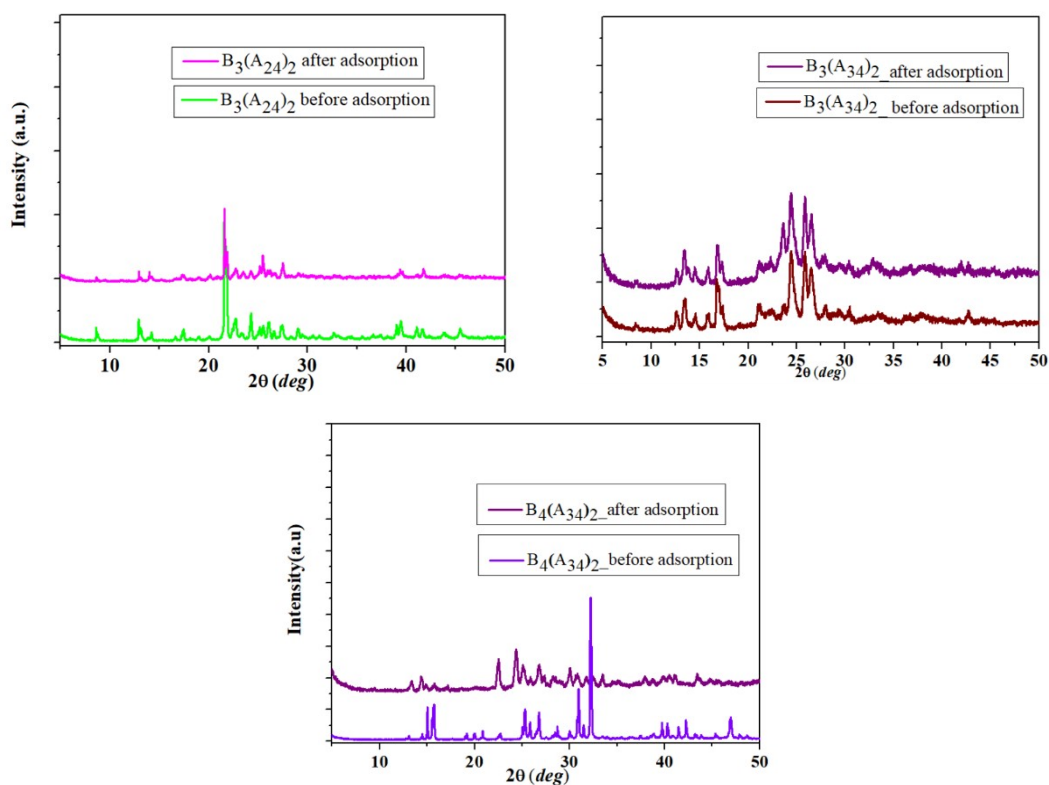

Figure S25 PXRD data showing no significant change in diffraction peak after  $\text{I}_2$  adsorption

## Raman spectra

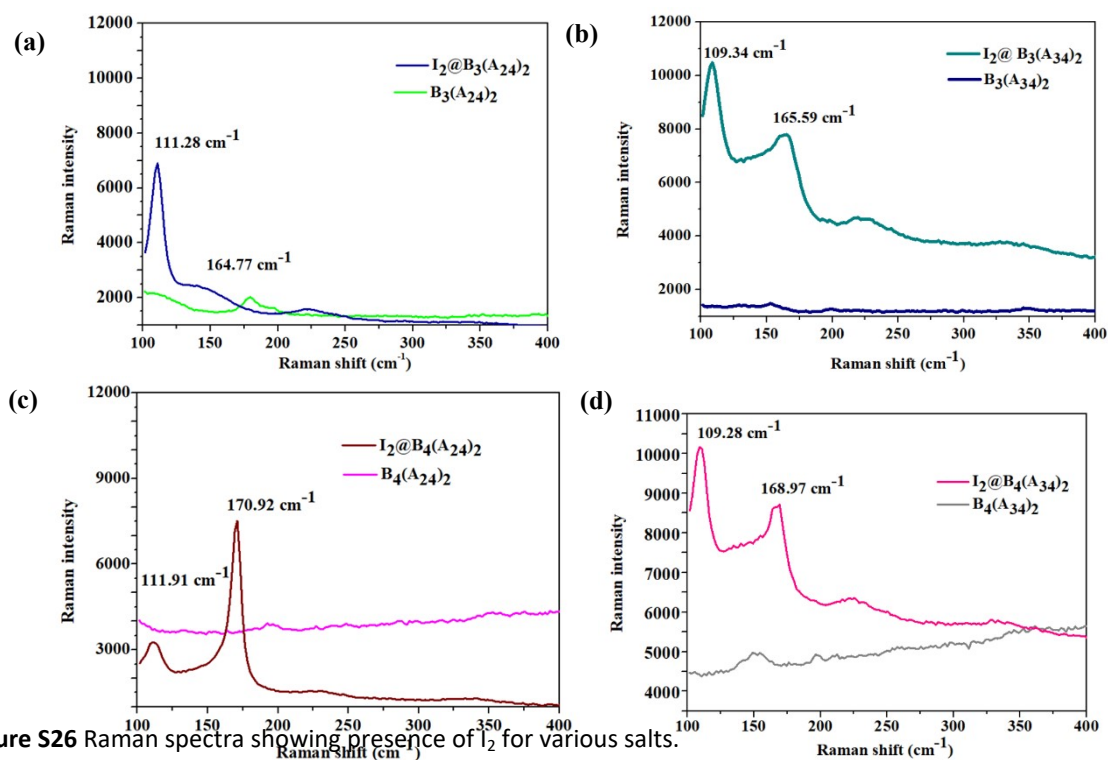

Figure S26 Raman spectra showing presence of  $I_2$  for various salts.

Table S6  $I_2$  Uptake Capacity of different materials

| Name & type of material                                      | $I_2$ adsorption phase         | $I_2$ adsorption capacity ( $mg \cdot g^{-1}$ ) | Ref.             |
|--------------------------------------------------------------|--------------------------------|-------------------------------------------------|------------------|
| Simple organic salts of dichlorocinnamic acids with diamines | Vapor phase                    | 330                                             | <i>This work</i> |
| Triazine-based porous organic polymers (NRPOP-1, NRPOP-2)    | Iodine in cyclohexane solution | 177 and 261                                     | S1               |
| triazene-anthracene-based POP                                | Iodine in cyclohexane solution | 243                                             | S2               |
| Cu-loaded MOF-303                                            | Vapor phase                    | 743 and 837                                     | S3               |
| Unmodified Th-UiO-66                                         | Vapor phase                    | 334                                             | S4               |
| Electron rich POP with imine bonds                           | Iodine in n-hexane solution    | 546.1, 594.0 and 489.7                          | S5               |

## Electrical Conductivity Measurements

The impedance spectroscopy of gel (both aqueous-DMSO and Ph-NO<sub>2</sub> gel) were measured using BioLogic (SP-150e) electrochemical workstation in the frequency range of 0.01 Hz-0.5 MHz. Here, electrical measurement was carried out by dipping two copper plates into the Gel. A white sponge is inserted to keep the electrode in place during measurement. Distance between plates = 1.5 cm and area covered by the gel is 0.5× 0.5 cm<sup>2</sup>.

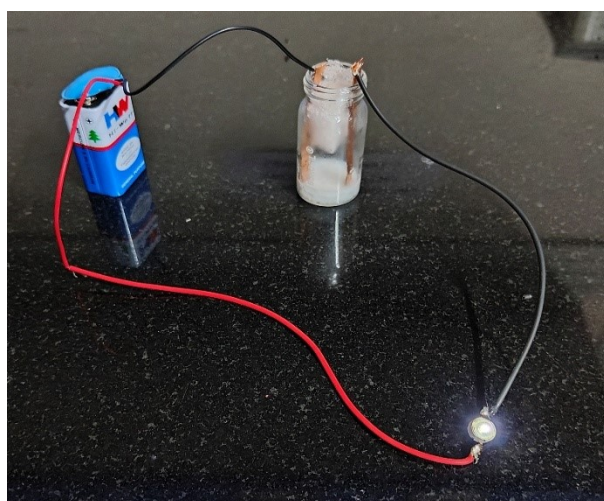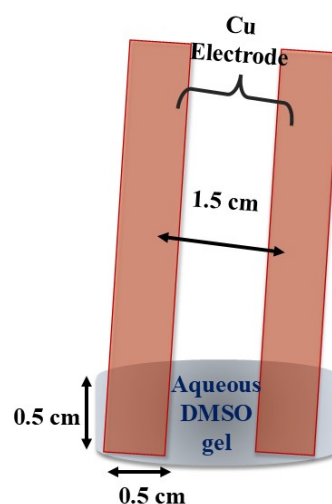

**Figure S27** Gel capable of lighting a LED bulb.

The electrical conductivities of the pellets were calculated using the same formula  $\sigma = L/(R \times A)$ , L is the distance between the two electrodes (here, 0.1 cm), R is the measured resistance, and A is the area of the sample: *i.e.*  $\pi (1)^2$ , the diameter of the circular pellet is 1 cm.

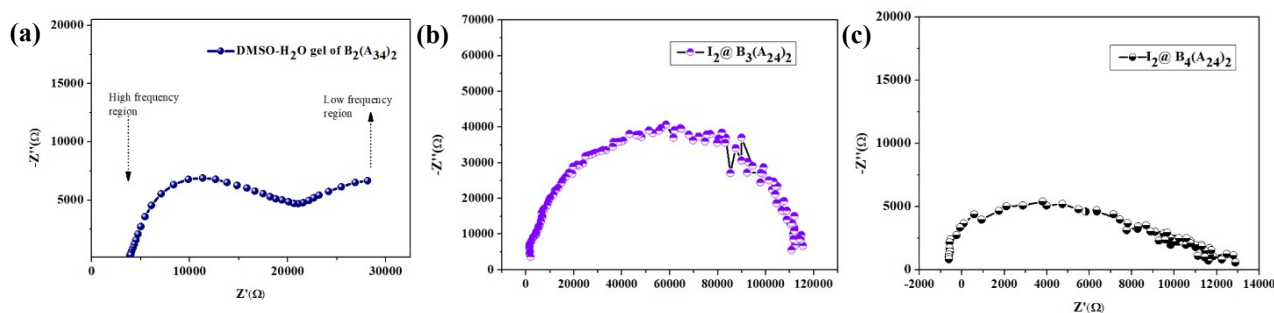

Conductivity value of B<sub>2</sub>(A<sub>34</sub>)<sub>2</sub> gel =  $1.6 \times 10^{-3} \text{ S cm}^{-1}$  at 25 °C

**Figure S28** Nyquist spectroscopy plot for aqueous-DMSO gel of B<sub>2</sub>(A<sub>34</sub>)<sub>2</sub> and I<sub>2</sub> adsorbed pellet of B<sub>3</sub>(A<sub>24</sub>)<sub>2</sub> and B<sub>4</sub>(A<sub>24</sub>)<sub>2</sub>

## Reference:

- [S1]. A. Mohan, M. H. Al-Sayah, A. Ahmed and O. M. El-Kadri, Triazine-Based Porous Organic Polymers for Reversible Capture of Iodine and Utilization in Antibacterial Application, *Sci. Rep.* 2022, **12**, 2638.
- [S2]. M. A. Sabri, M. H. Al-Sayah, S. Sen, T. H. Ibrahim and O. M El-Kadri, Fluorescent Amino Linked Porous Organic Polymer for Reversible Iodine Capture and Sensing, *Sci. Rep.* 2020, **10**, 15943
- [S3]. M. Li, X. Wang, J. Zhang, Y. Gao and W. Zhang, Cu-Loaded MOF-303 for Iodine Adsorption: The Roles of Cu Species and Pyrazole Ligands, *Appl. Surf. Sci.* 2023, **619**, 156819.
- [S4]. Z.-J. Li, Y. Ju, H. Lu, X. Wu, X. Yu, Y. Li, X. Wu, Z.-H. Zhang, J. Lin, Y. Qian, M.-Y. He and J.-Q Wang, Boosting the Iodine Adsorption and Radioresistance of Th-Uio-66 MOFs via Aromatic Substitution, *Chem. - Eur. J.* 2021, **27**, 1286–1291.
- [S5]. P. Tian, Z. Ai, H. Hu, M. Wang, Y. Li, X. Gao, J. Qian, X. Su, S. Xiao, H. Xu, F. Lu and Y. Gao, Synthesis of Electron-Rich Porous Organic Polymers via Schiff-Base Chemistry for Efficient Iodine Capture, *Molecules* 2022, **27**, 5161.
- [S6]. L. Pan, G. Yu, D. Zhai, H. R. Lee, W. Zhao, N. Liu, H. Wang, B. C.-K. Tee, Y. Shi, Y. Cui and Z. Bao, Hierarchical Nanostructured Conducting Polymer Hydrogel with High Electrochemical Activity, *Proc. Natl. Acad. Sci. U. S. A.* 2012, **109**, 9287–9292
- [S7]. B. Yao, H. Wang, Q. Zhou, M. Wu, M. Zhang, C. Li, G. Shi, Ultrahigh-Conductivity Polymer Hydrogels with Arbitrary Structures, *Adv. Mater.* 2017, **29**, 1700974
- [S8]. Y. Lu, W. He, T. Cao, H. Guo, Y. Zhang, Q. Li, Z. Shao, Y. Cui and X. Zhang, Elastic, Conductive, Polymeric Hydrogels and Sponges, *Sci. Rep.* 2014, **4**, 5792.
- [S9]. B. Cao, Q. Tang, L. Li, C.-J. Lee, H. Wang, Y. Zhang, H. Castaneda, G. Cheng, Integrated Zwitterionic Conjugated Poly(Carboxybetaine Thiophene) as a New Biomaterial Platform, *Chem. Sci.* 2015, **6**, 782–788.
- [S10]. D. Mawad, E. Stewart, D. L. Officer, T. Romeo, P. Wagner, K. Wagner and G. G. Wallace, Conducting Polymer Hydrogels: A Single Component Conducting Polymer Hydrogel as a Scaffold for Tissue Engineering, *Adv. Funct. Mater.* 2012, **22**, 2691–2691.
- [S11]. C. Mahendar, Y. Kumar, M. K. Dixit, M. Mukherjee, A. Kalam and M. Dubey, Conductive Zn(II)-Metallohydrogels: The Role of Alkali Metal Cation Size in Gelation, Rheology and Conductance, *Mol. Syst. Des. Eng.* 2021, **6**, 654–661.
